# Supplementary material for: Integrated Mechanisms of Polarity–Based Extracts of Cucumis melo L. Seed Kernels for Airway Smooth Muscle Relaxation via Key Signaling Pathways Based on WGCNA, In Vivo, and In Vitro Analyses
Source: MDPI journal article supplement (doi:10.3390/ph15121522), 2022-12-07
Supplement: s1 [file s1]

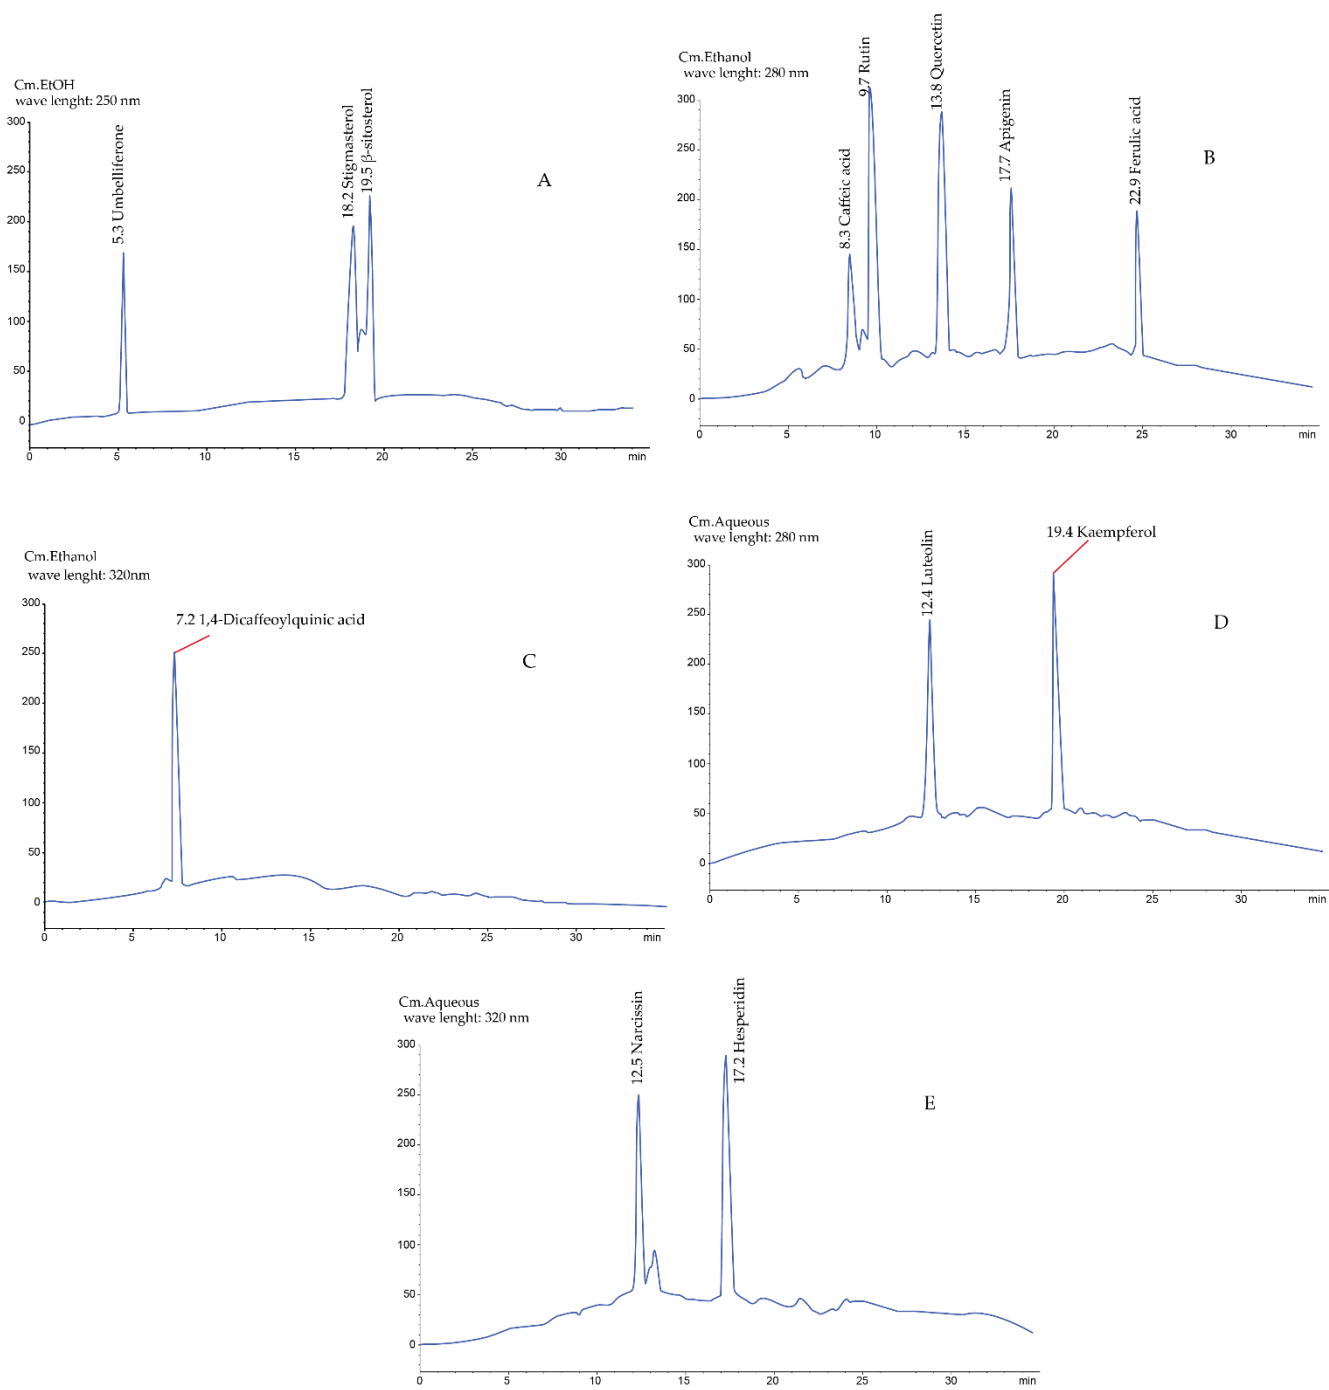

**Figure S1.** HPLC DAD-UV/Vis chromatograms of a *C. melo* seed extracts at different wavelengths and standard addition validation chromatograms of bioactive compounds.

GSE41649 Asthmatic vs Control

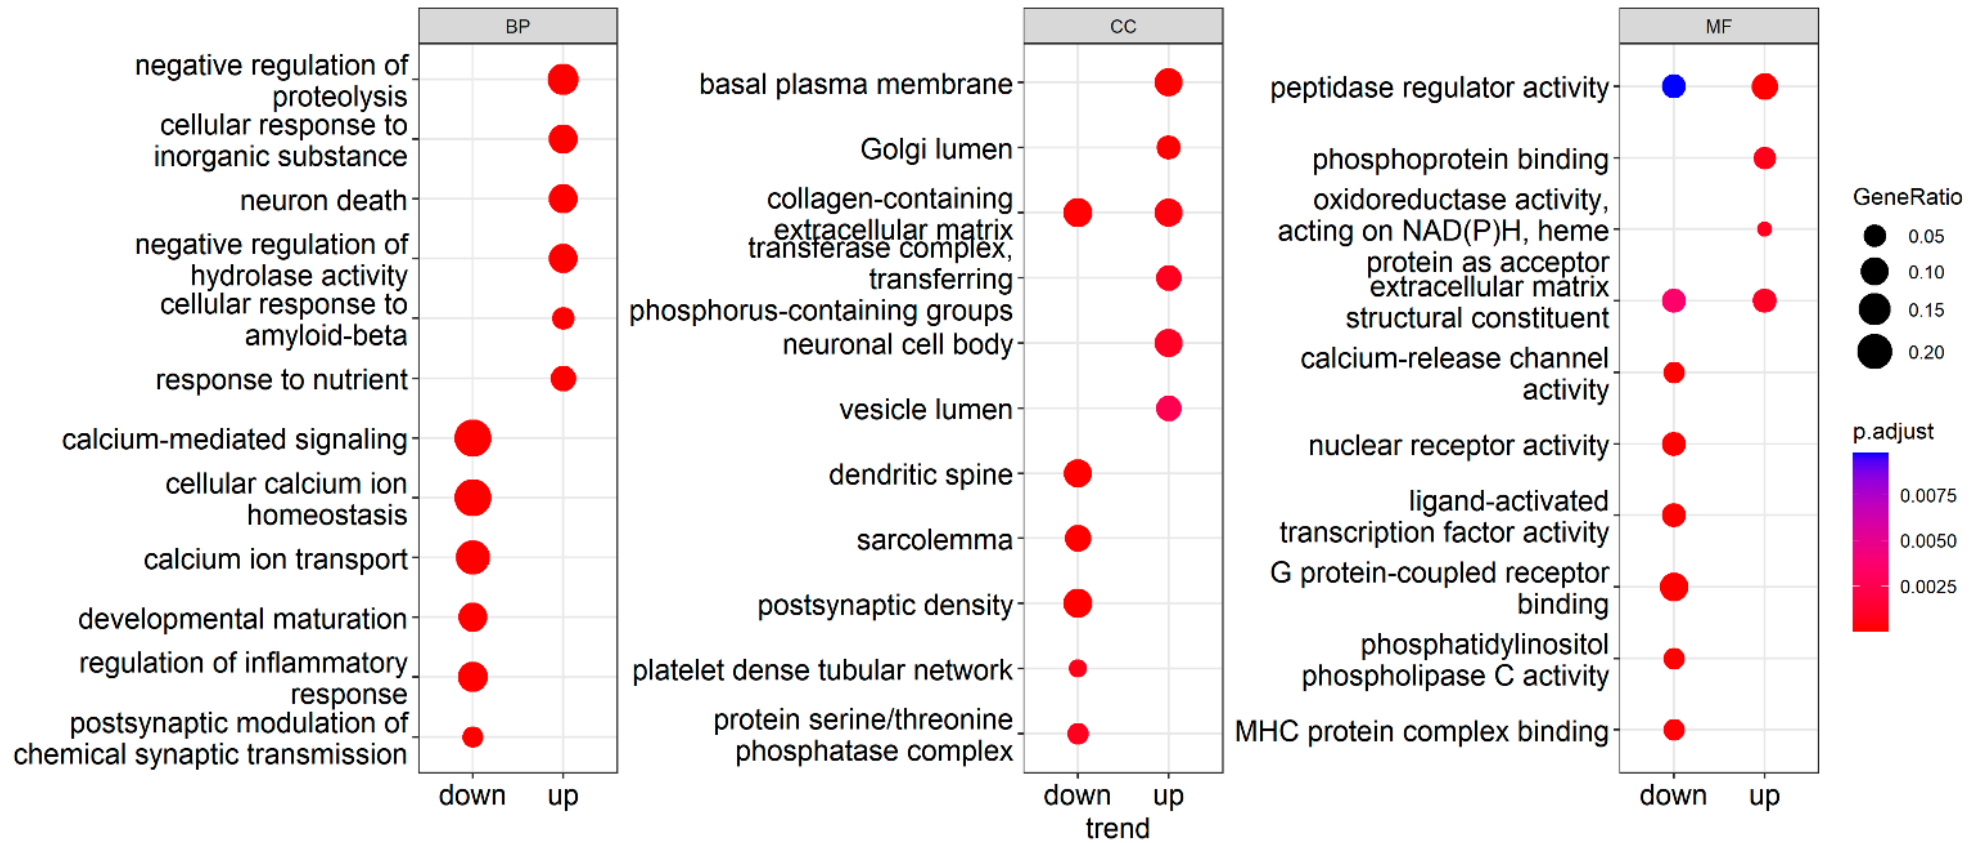

GSE15823 : Allergic\_asthma vs Control

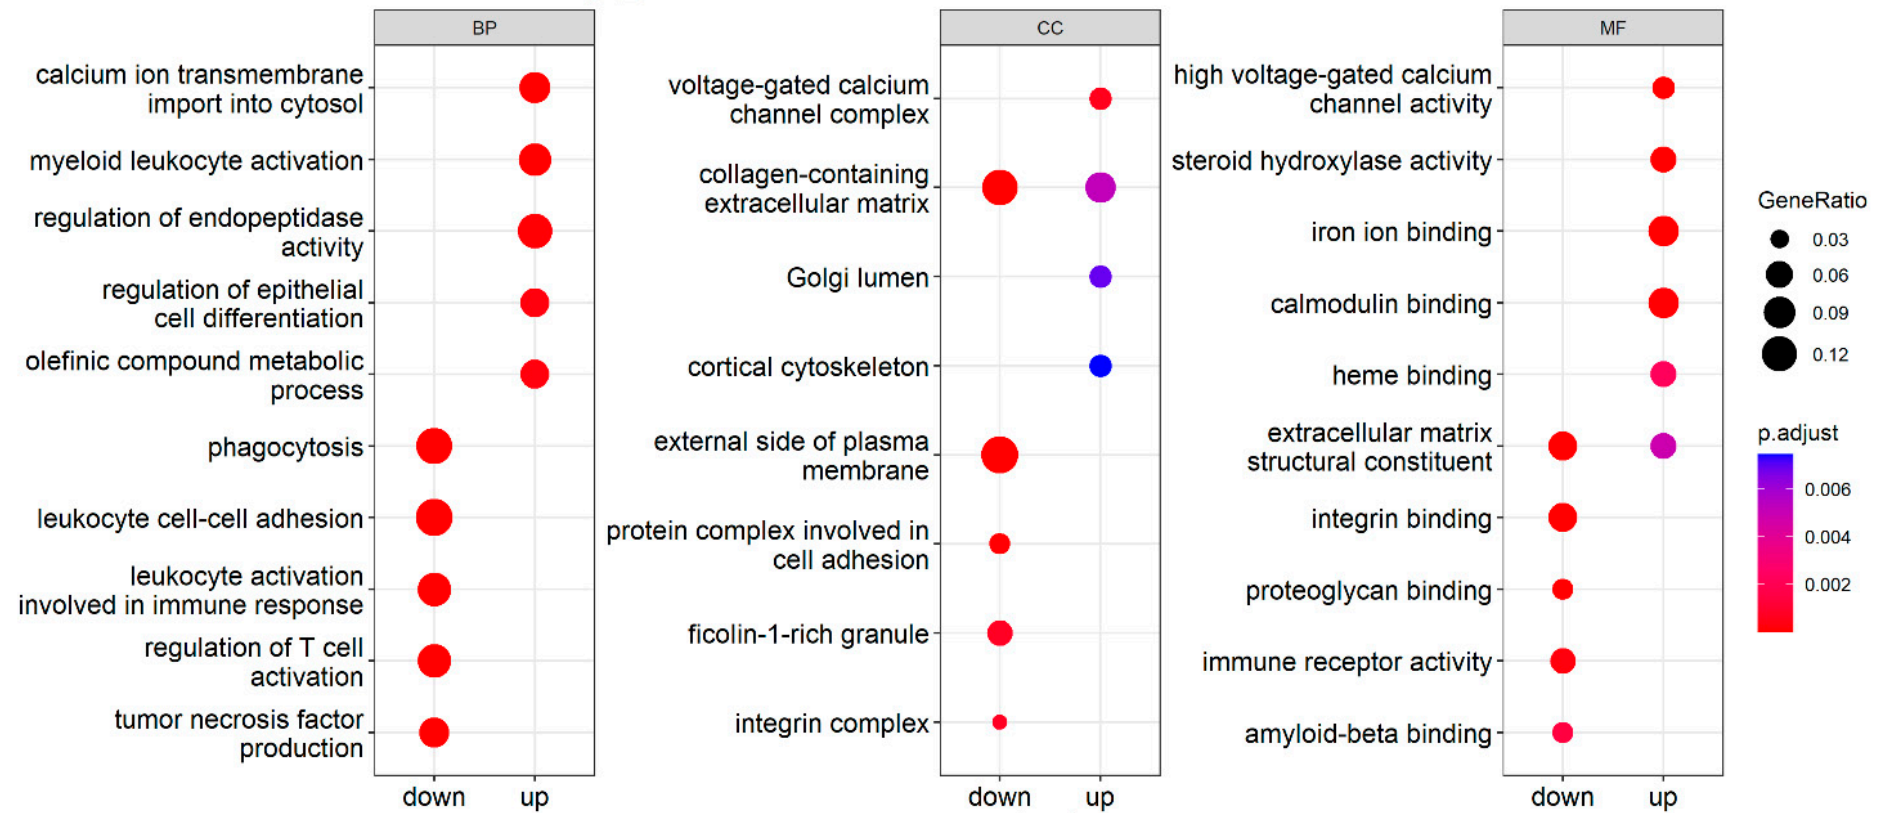

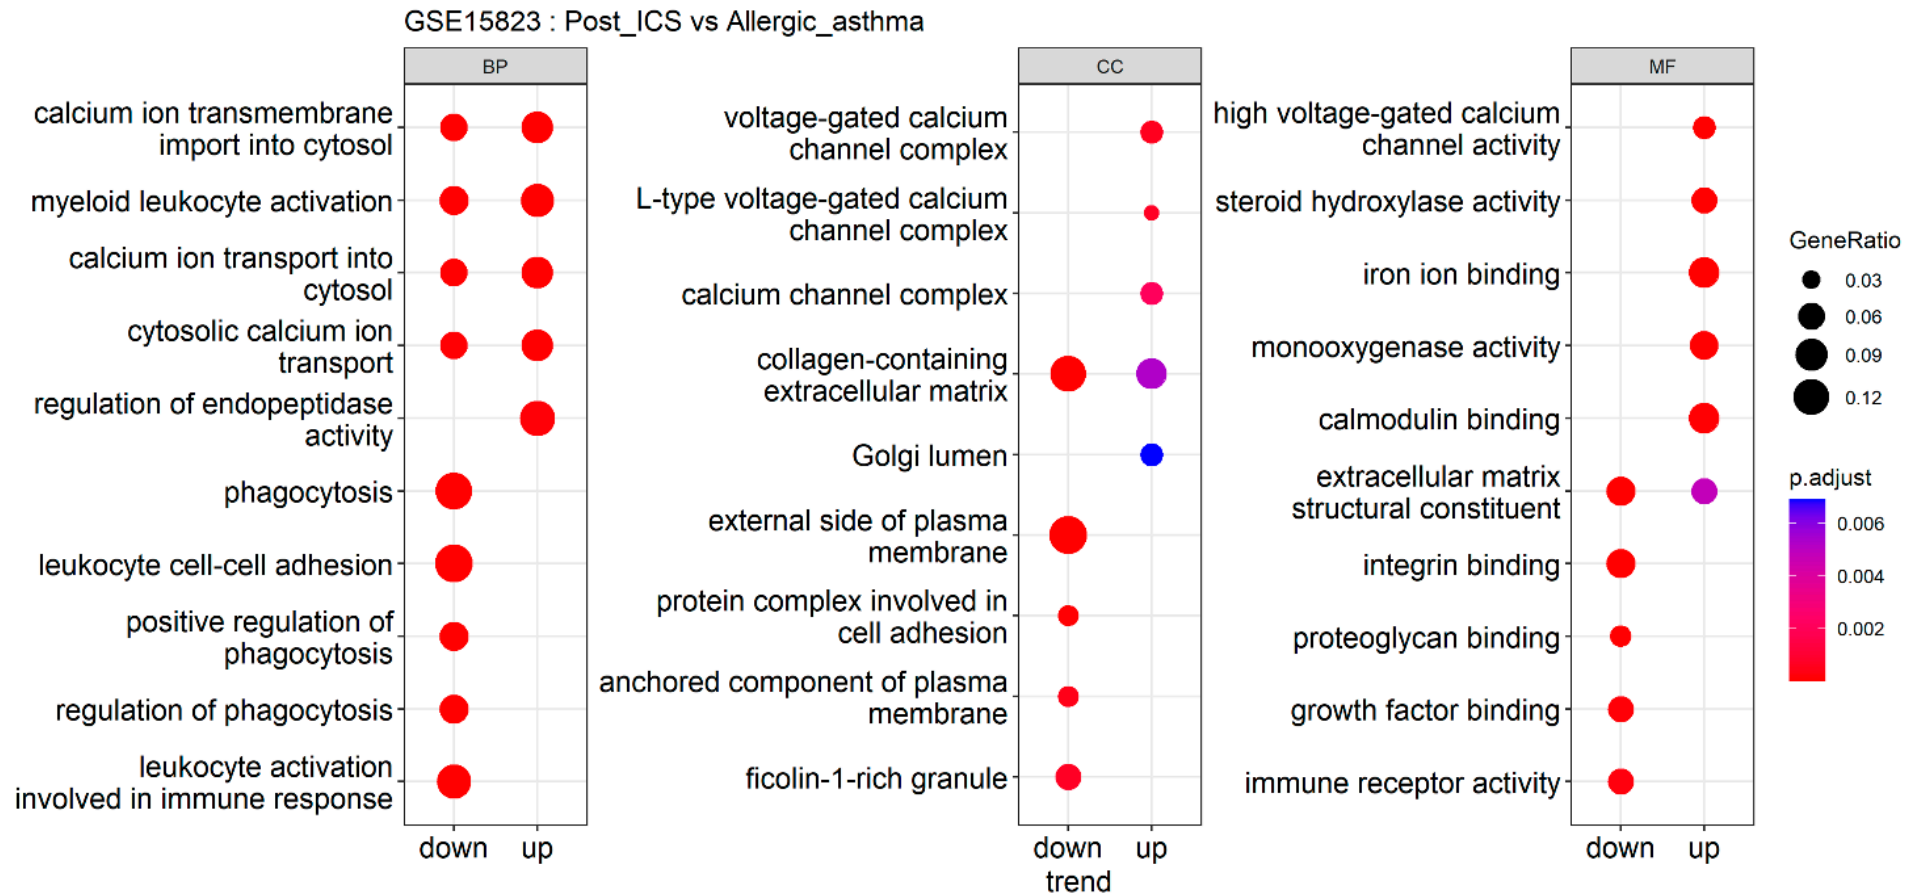

## A. GO enrichment of differentially expressed genes

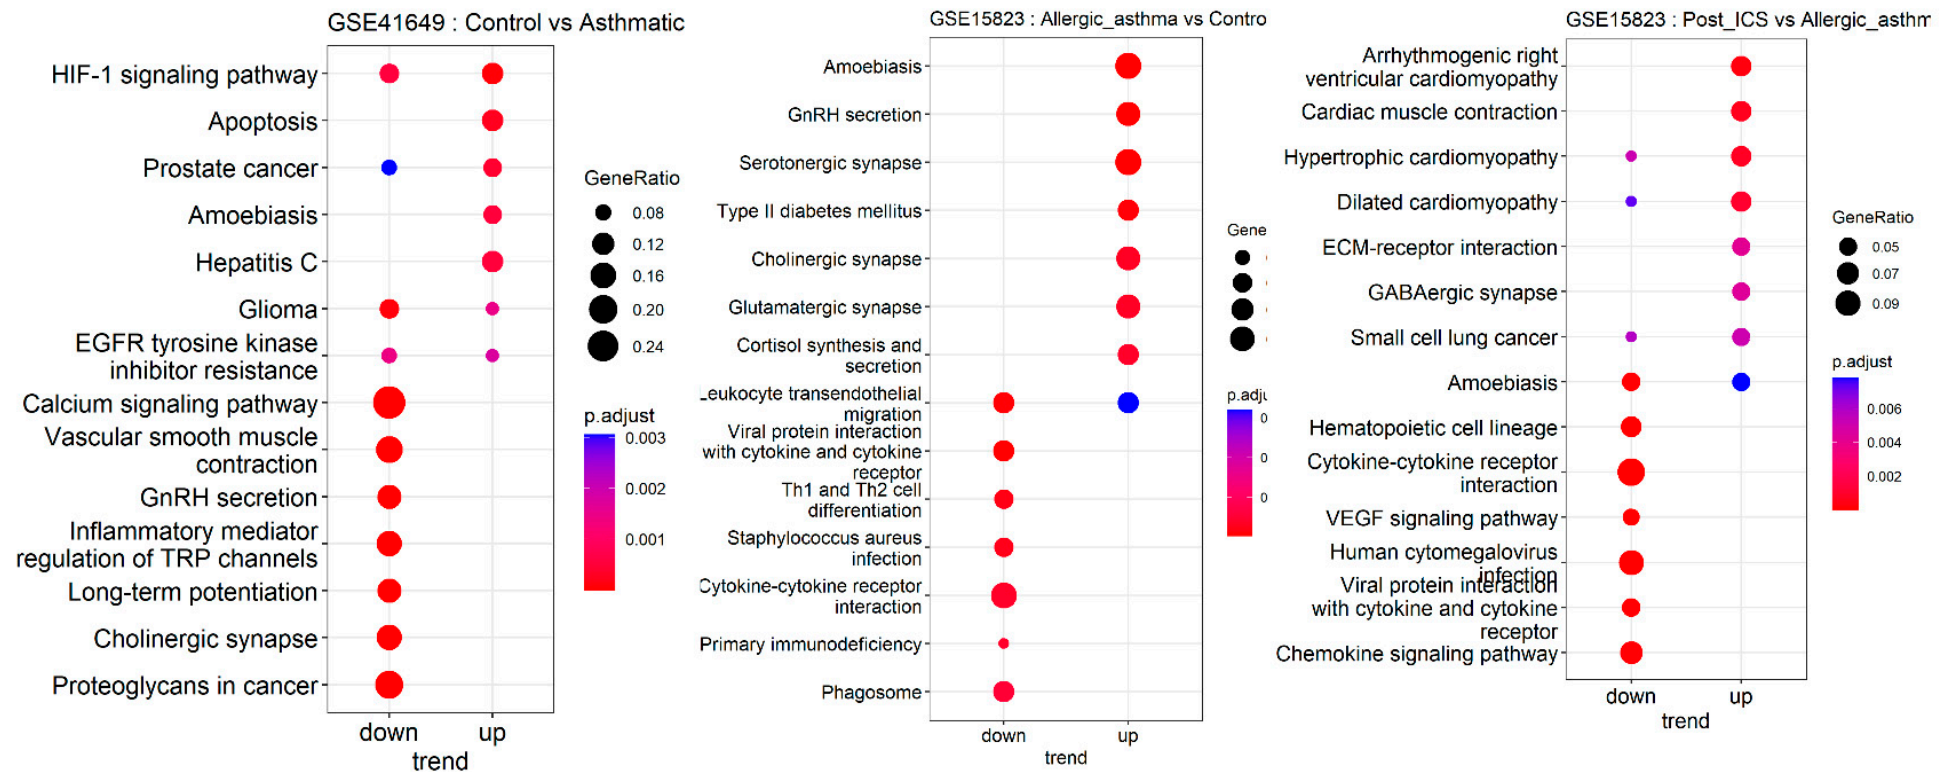

## B. KEGG pathways enrichment of differentially expressed genes

**Figure S2.** Functional enrichments of up-regulated and down-regulated DEGs of datasets. **A.** Gene Ontology. **B.** KEGG pathways enrichment. G.O.: Gene Ontology; B.P.: Biological process; CC: cellular compartment; M.F.: molecular functions

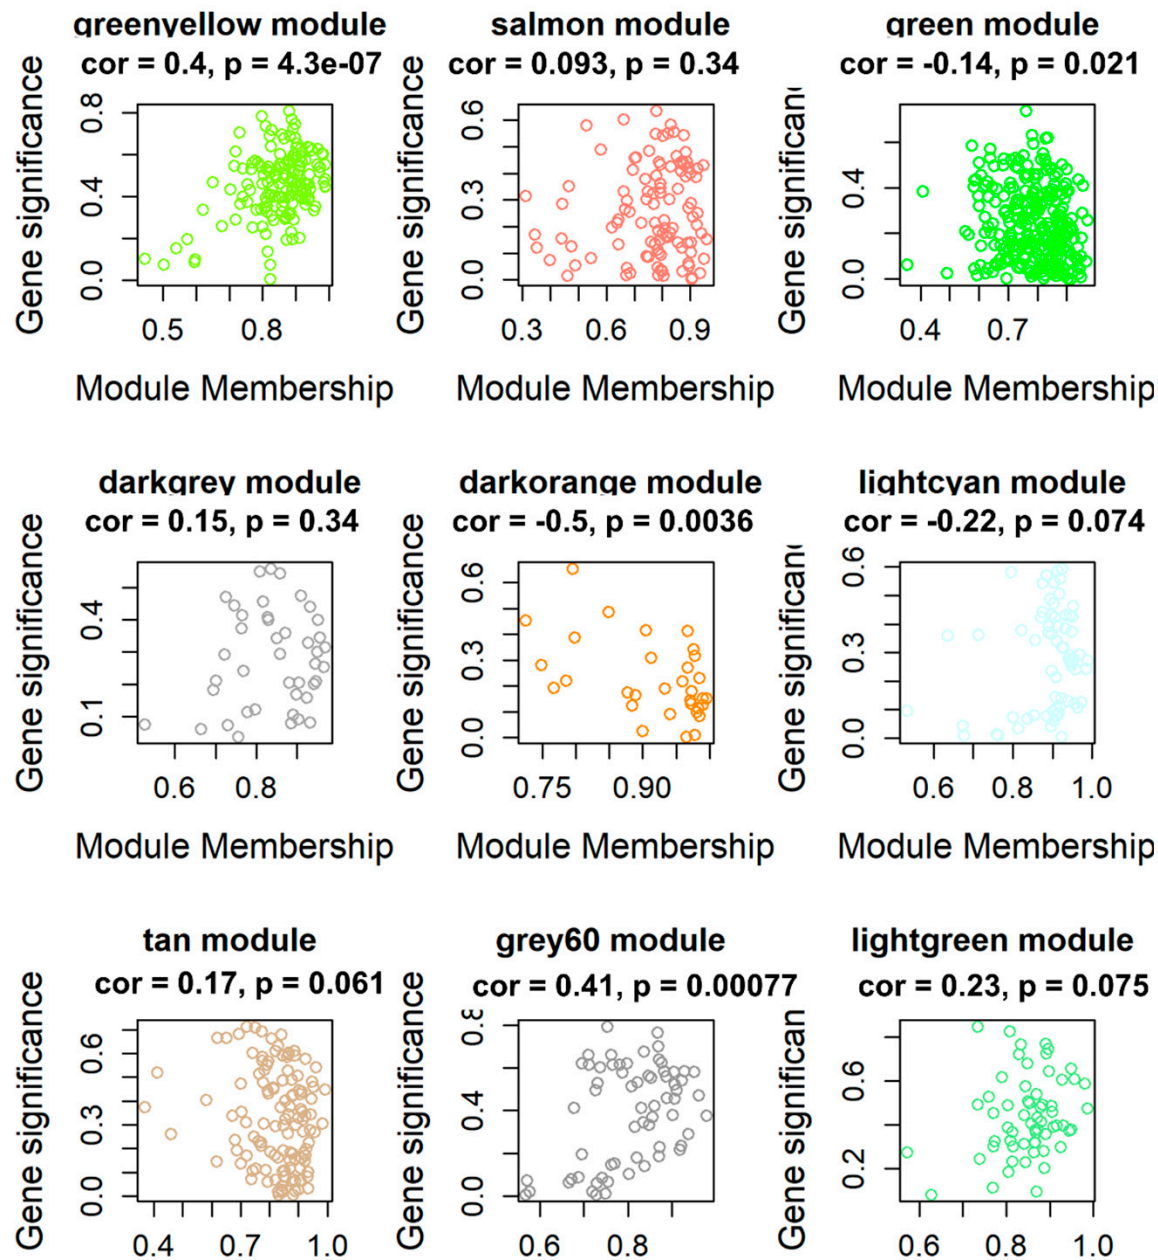



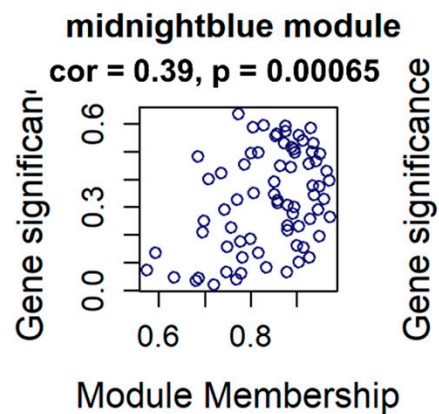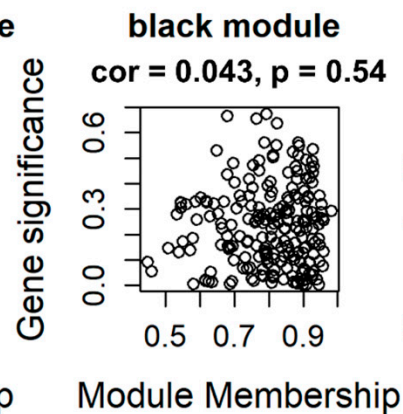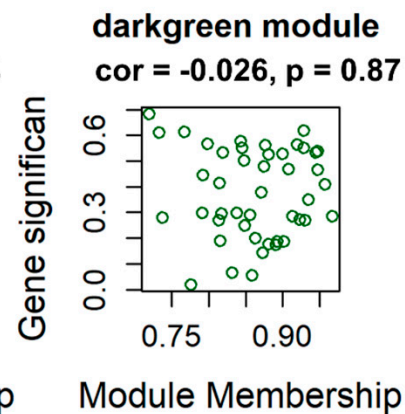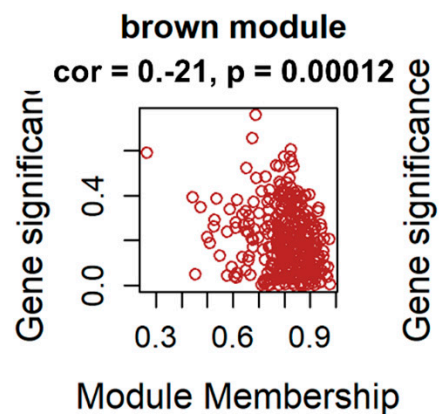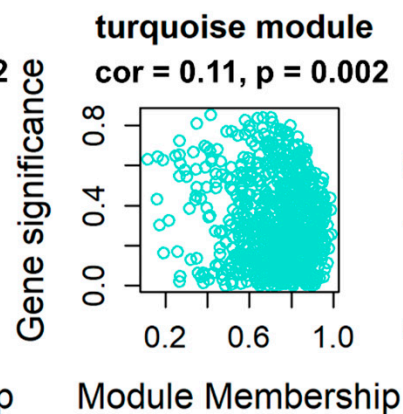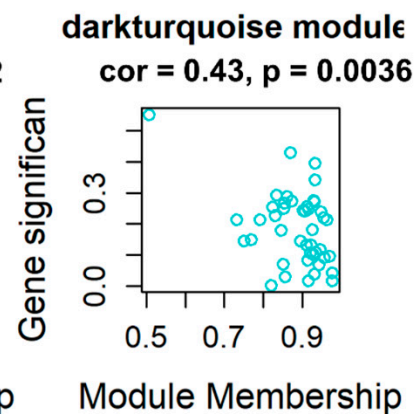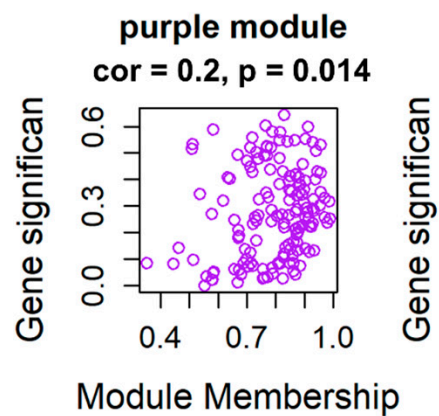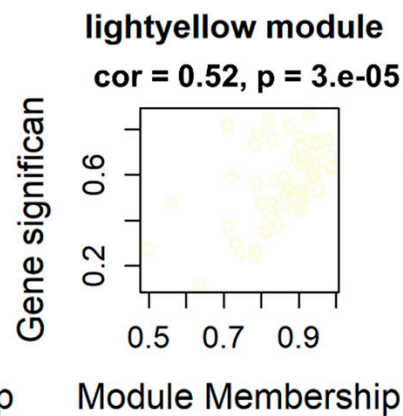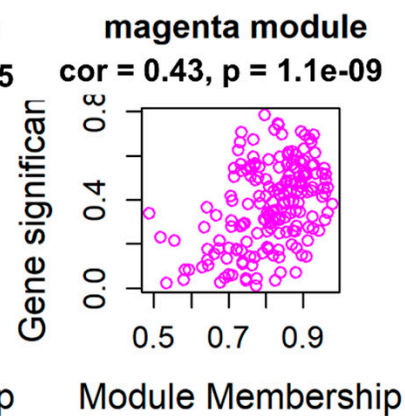

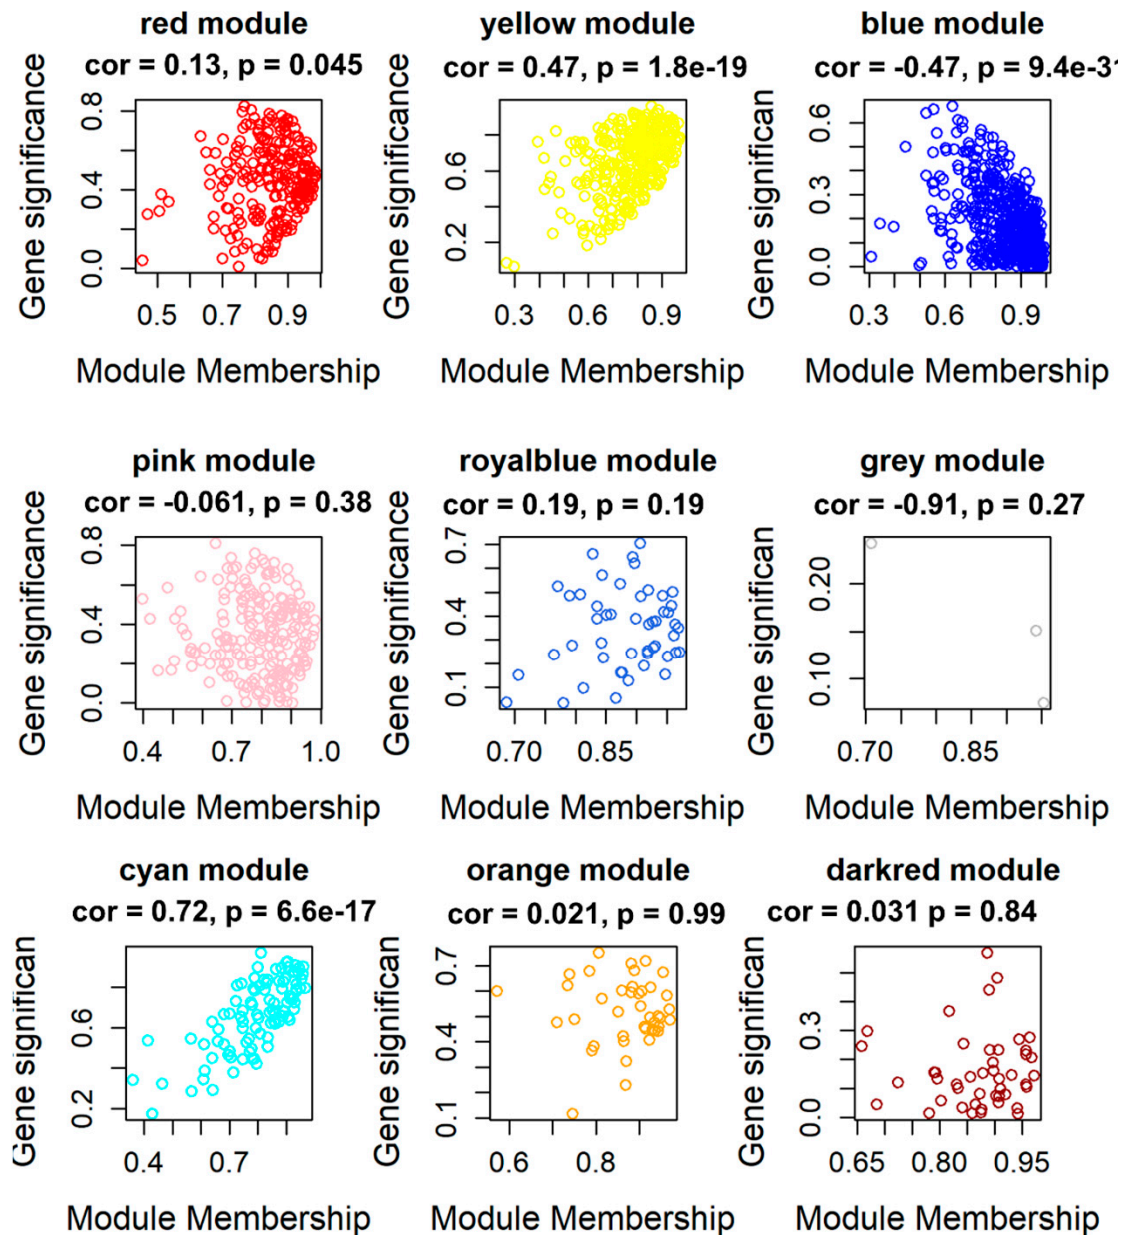

A. Identification potential WGCNA modules of GSE41649



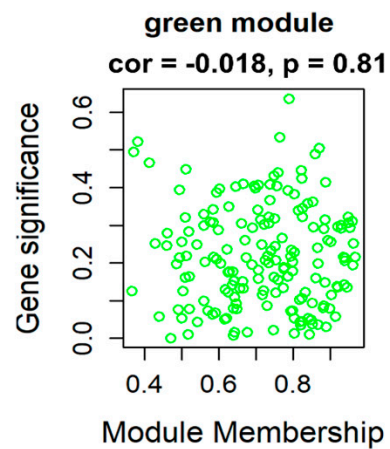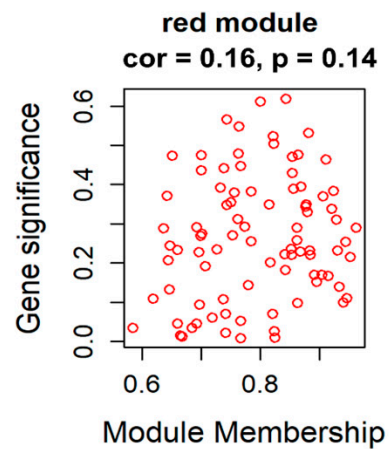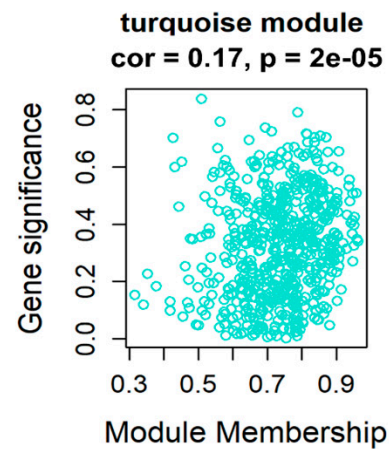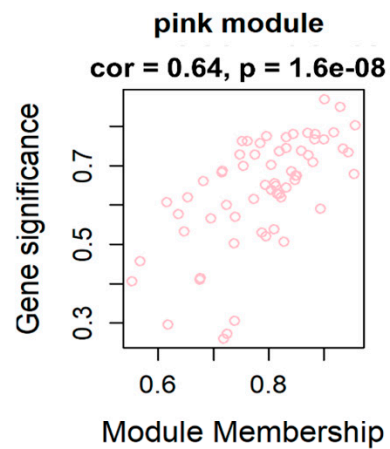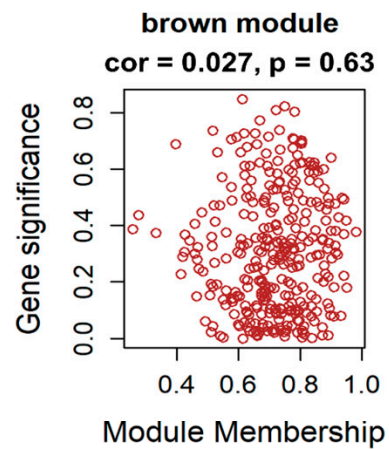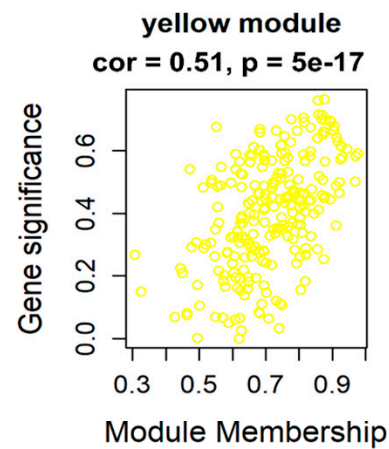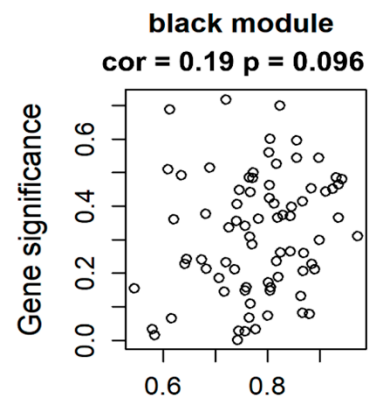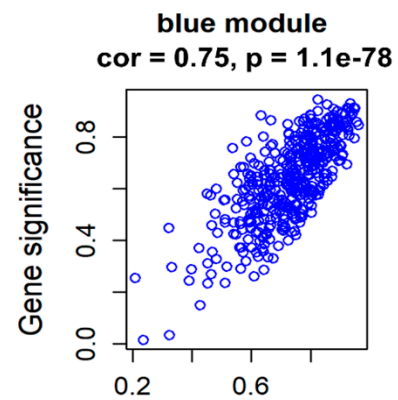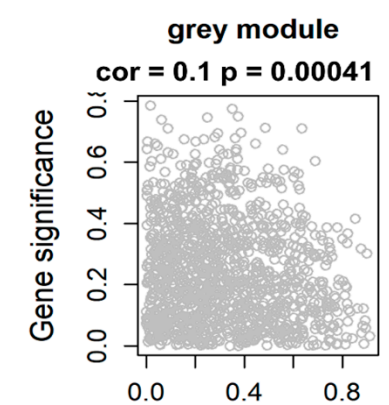

**Figure S3** Identification of potential WGCNA hub-genes.

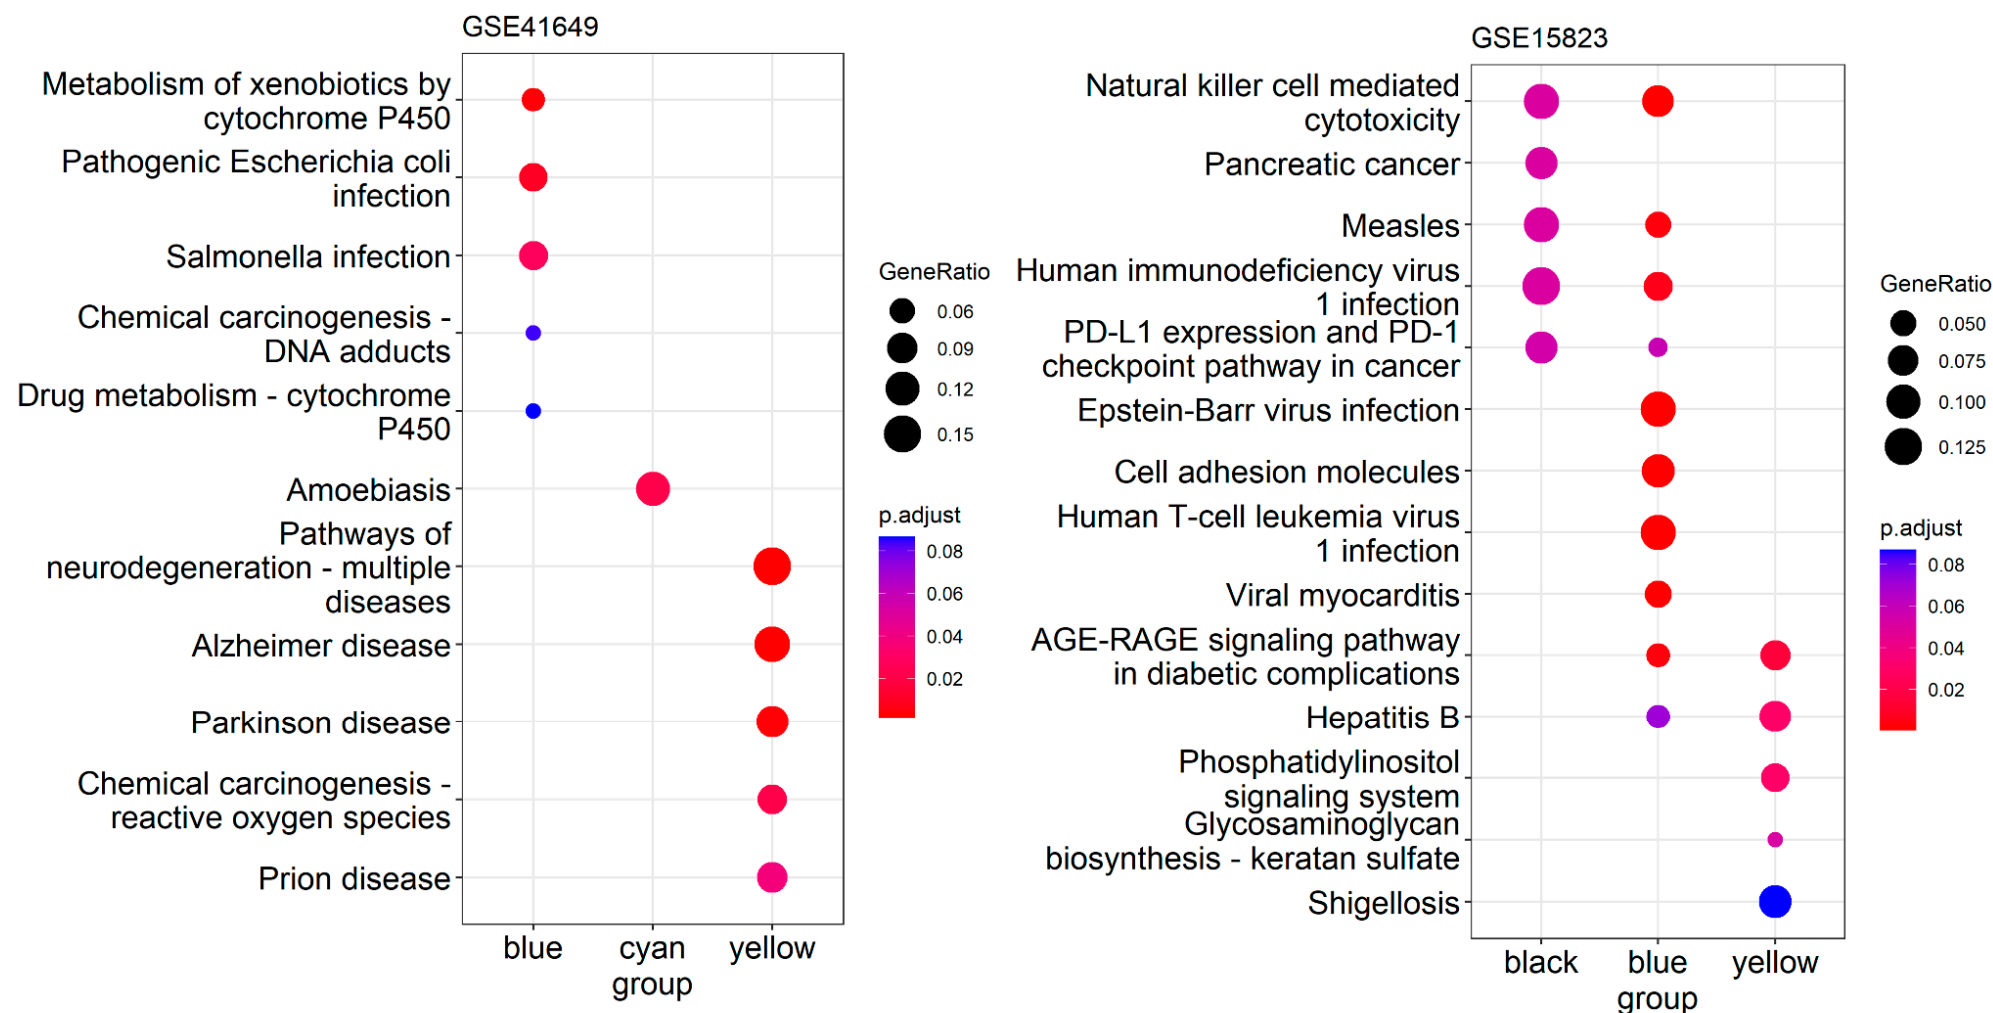

### B. KEGG pathways enrichment of top 4 modules

**Figure S4.** The functional enrichment of top 4 WGCNA modules of GSE41649 and GSE15283. **A.** Gene Ontology (G.O.) enrichment in biological process (B.P.), cellular compartment (CC), and molecular functions (M.F.). **B.** KEGG pathways enrichment.



**Figure S5.** GSEA of GSE41649 for GO and KEGG functional enrichment.





**Figure S6.** GSEA of GSE15823 for GO and KEGG functional enrichment.

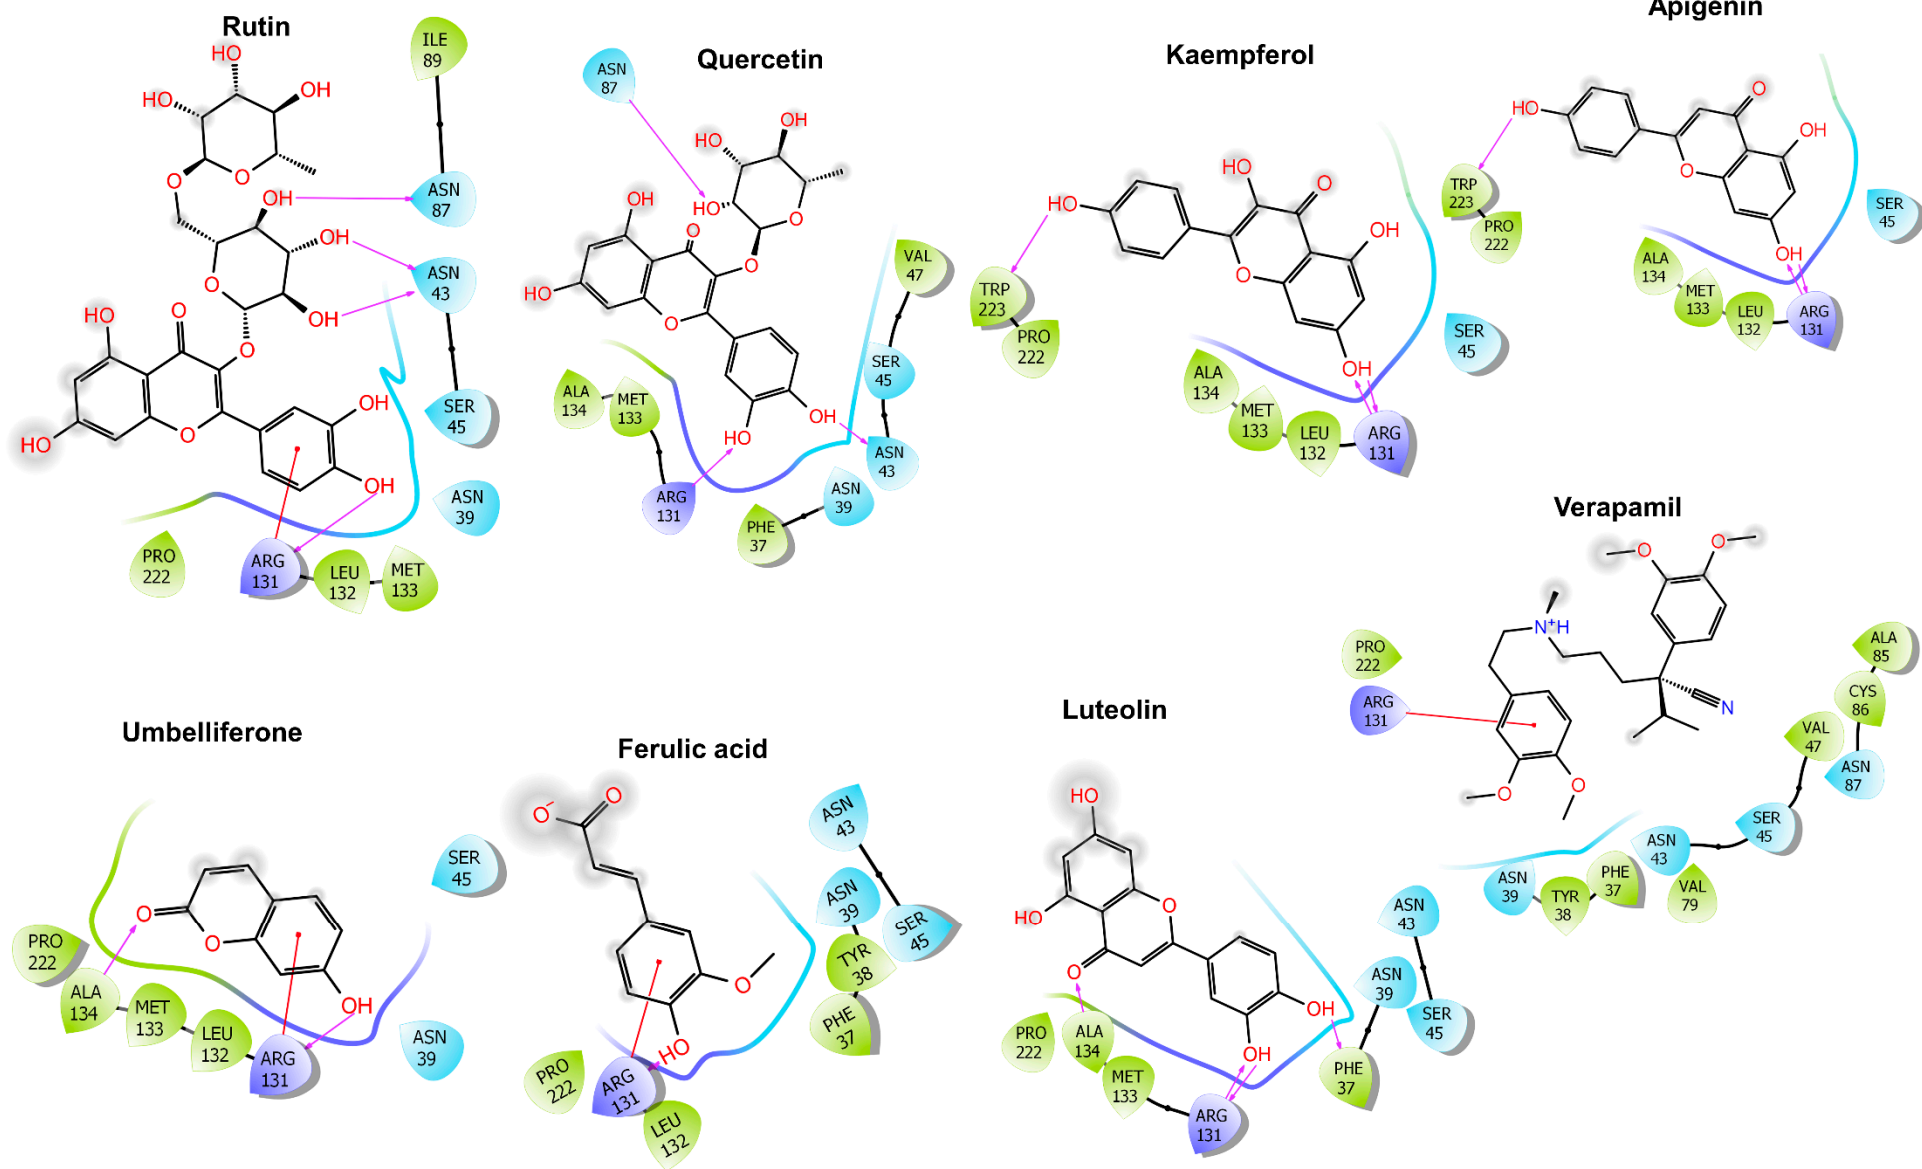

**A. Interleukin 2 Receptor Subunit  $\beta$  (IL2RB)**

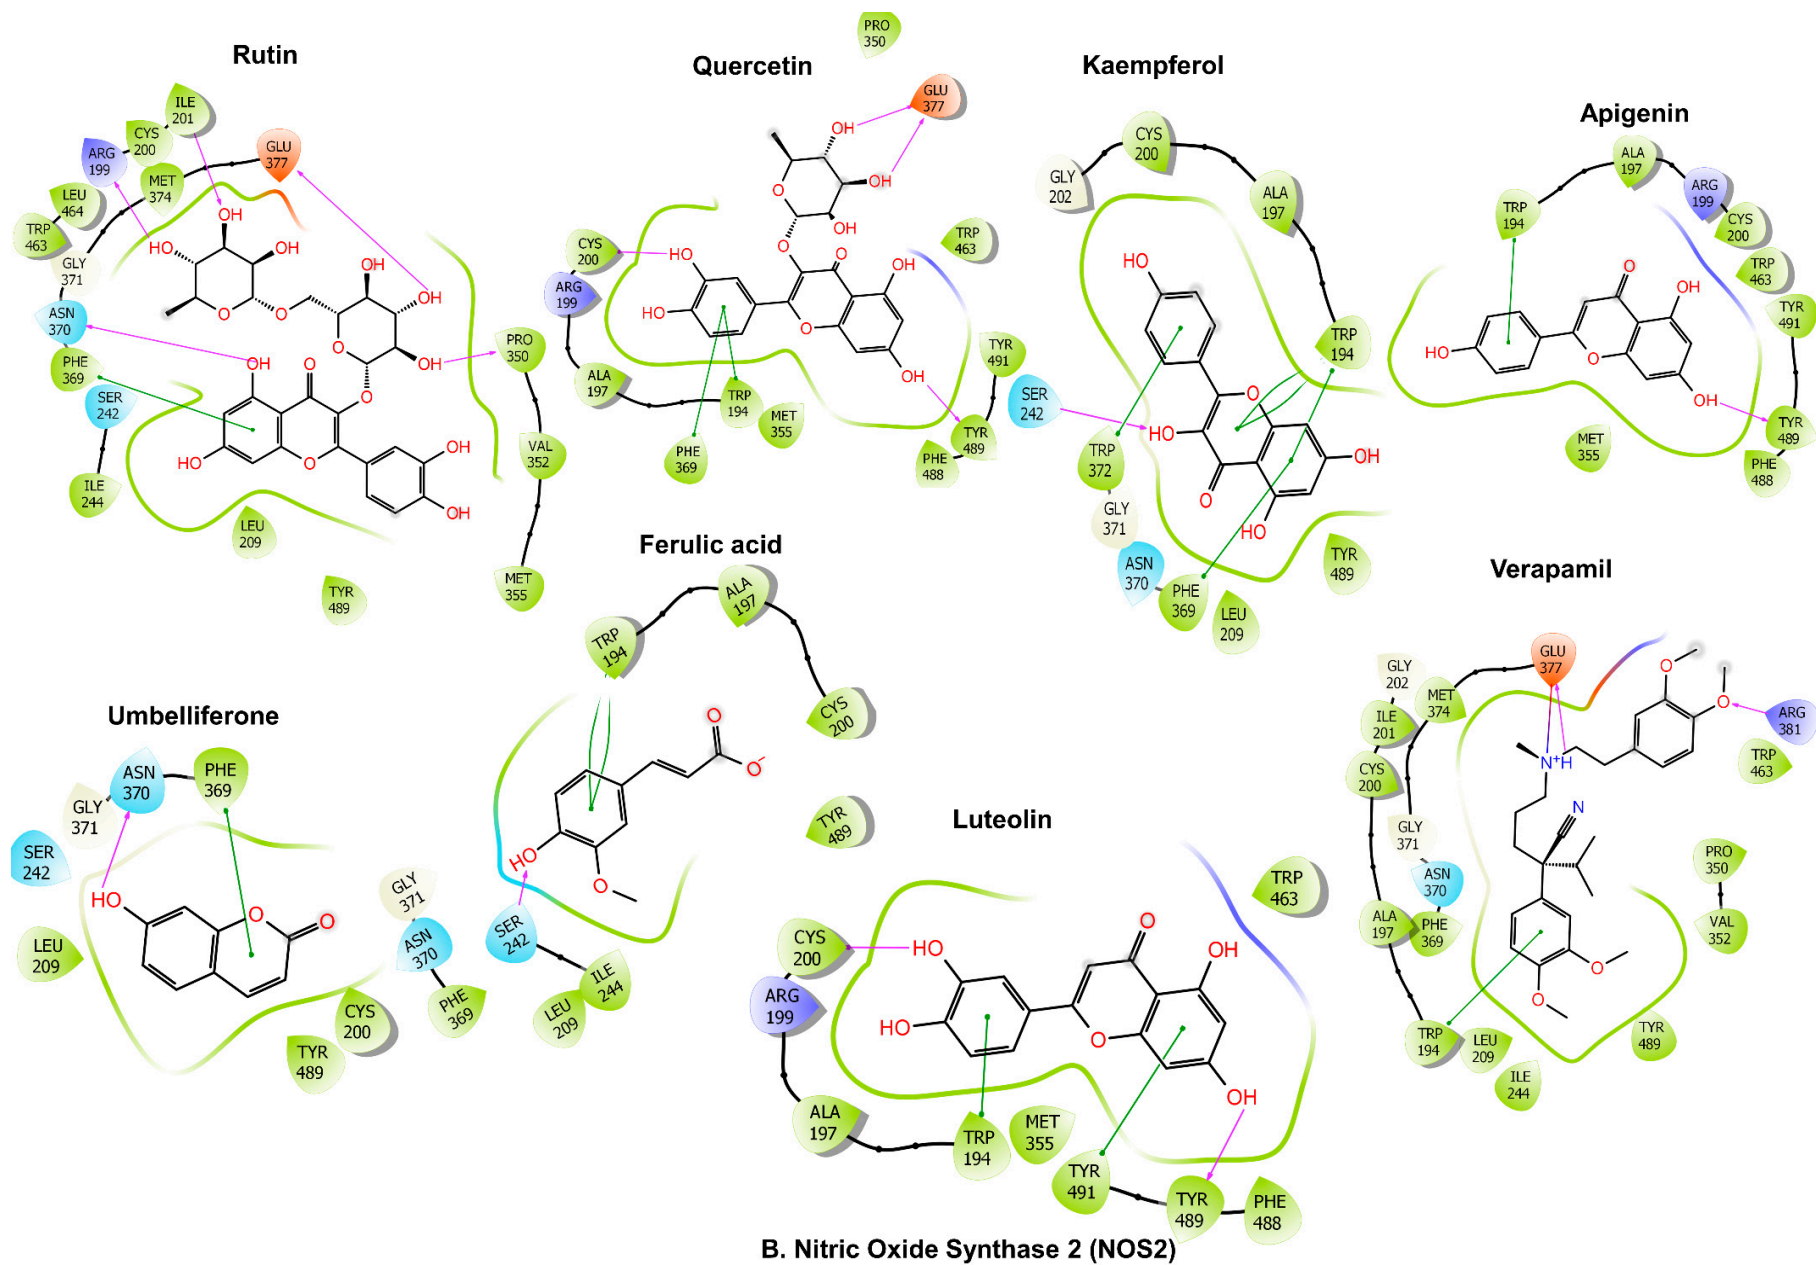

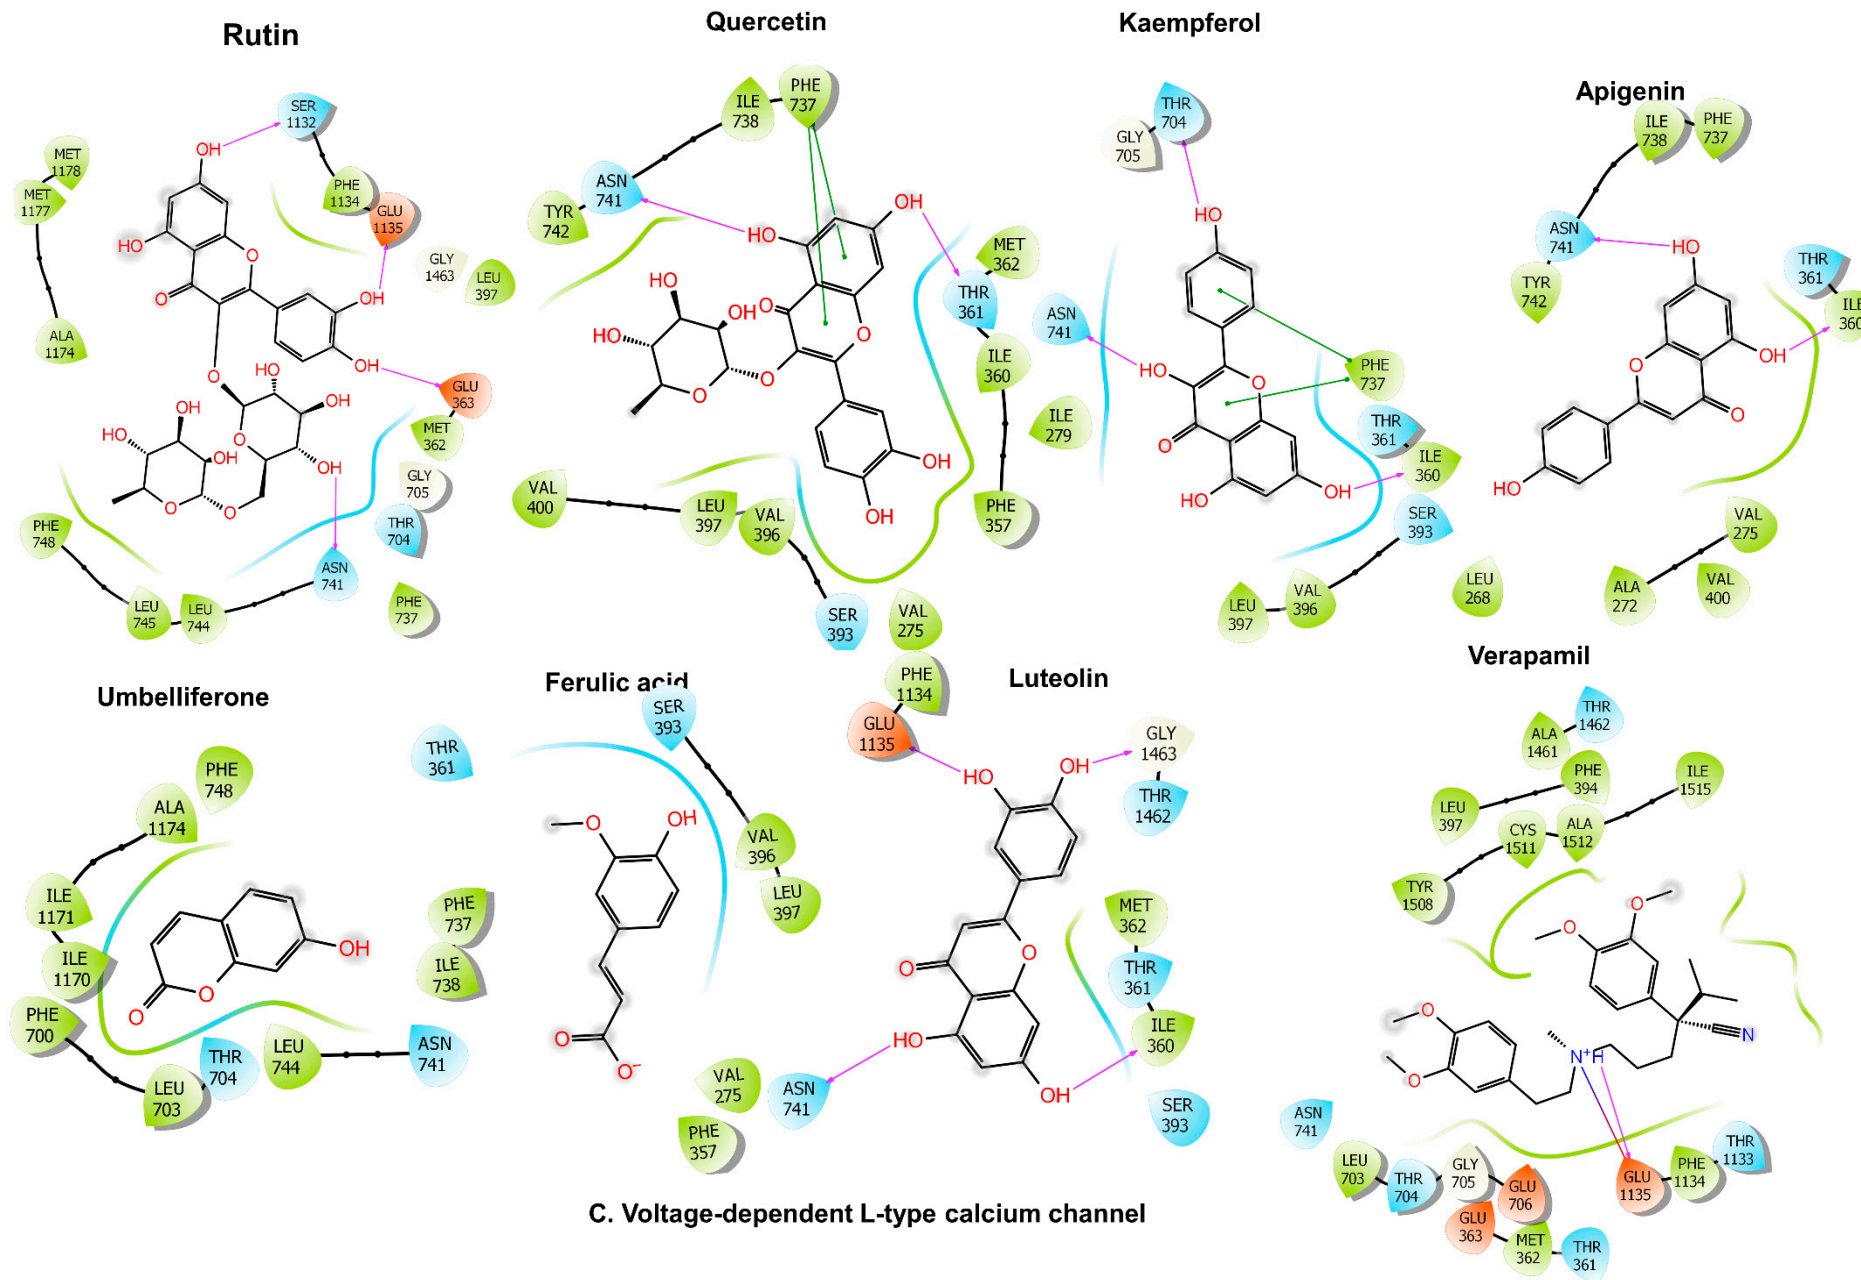



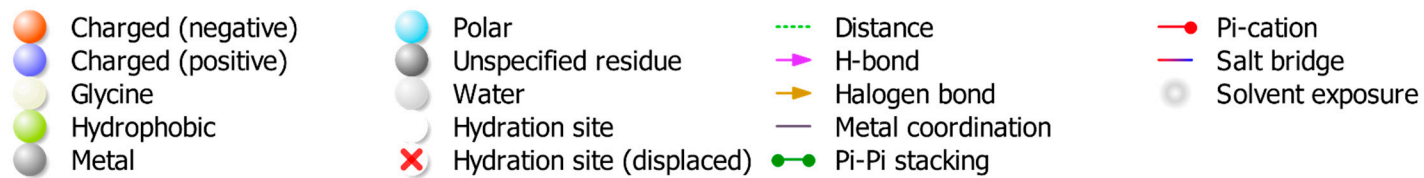

**Figure S7.** 2D ligand-protein interaction between bioactive compounds of *C. melo* seed sequential extracts and proteins; **A.** Interleukin 2 Receptor Subunit  $\beta$  (IL2RB) **B.** Nitric Oxide Synthase 2 (NOS2) **C.** Voltage-dependent L-type calcium channel subunit alpha 1C  $\alpha$ .

**Table S1.** Identification of phytoconstituents of *C. melo* seeds extracts with LC ESI-MS/MS.

| Extract | Molecular Weight | Observed MS ( <i>m/z</i> ) | Calculated MS ( <i>m/z</i> ) | Error | Precursor type     | ESI-IT MS/MS (Ions)                                   | Empirical Formula                               | Proposed compound         | Class                               |
|---------|------------------|----------------------------|------------------------------|-------|--------------------|-------------------------------------------------------|-------------------------------------------------|---------------------------|-------------------------------------|
| Hexane  | 278.4            | 279.3318                   | 279.3312                     | -2.15 | [M-H] <sup>-</sup> | 279.08, 261.08, 247.08,                               | C <sub>18</sub> H <sub>30</sub> O <sub>2</sub>  | Linoleic acid             | Polyunsaturated fatty acid; omega-6 |
|         | 228.37           | 227.2014                   | 227.2019                     | 2.20  | [M-H] <sup>-</sup> | 228.25, 227.25, 136.25                                | C <sub>14</sub> H <sub>28</sub> O <sub>2</sub>  | myristic acid             | Fatty acids                         |
|         | 256.42           | 255.2327                   | 255.2319                     | -3.13 | [M-H] <sup>-</sup> | 255, 237, 223, 217, 181                               | C <sub>16</sub> H <sub>32</sub> O <sub>2</sub>  | Palmitic acid             | Fatty acids                         |
| DCM     | 414.7            | 413.3785                   | 413.3777                     | -1.94 | [M-H] <sup>-</sup> | 412.08, 311.25, 297, 285.08, 255.08, 236.08, 171, 119 | C <sub>29</sub> H <sub>50</sub> O               | β-sitosterol              | Phytosterols                        |
|         | 412.69           | 413.8455                   | 413.8463                     | 1.93  | [M+H] <sup>+</sup> | 397, 379, 355, 342.1, 297,                            | C <sub>29</sub> H <sub>48</sub> O               | Stigmasterol              | Sterol                              |
|         | 162.14           | 161.0249                   | 161.0247                     | -1.24 | [M-H] <sup>-</sup> | 161, 133, 117,                                        | C <sub>9</sub> H <sub>6</sub> O <sub>3</sub>    | Umbelliferone             | Hydroxycoumarins                    |
|         | 430.71           | 431.3882                   | 431.3879                     | -0.70 | [M+H] <sup>+</sup> | 432,165, 136,                                         | C <sub>29</sub> H <sub>50</sub> O <sub>2</sub>  | α-tocopherol              | Fat-soluble vitamin                 |
| Ethanol | 448.38           | 445.0979                   | 445.0970                     | -2.03 | [M-H] <sup>-</sup> | 445.25, 417.08, 327.08, 297                           | C <sub>21</sub> H <sub>20</sub> O <sub>11</sub> | Orientin                  | Flavone glucoside                   |
|         | 516.4            | 515.0226                   | 515.0214                     | -2.33 | [M-H] <sup>-</sup> | 471, 353, 335, 317, 299.25, 179                       | C <sub>25</sub> H <sub>24</sub> O <sub>12</sub> | 1,4-Dicaffeoylquinic acid | Quinic acids                        |
|         | 270.24           | 269.0462                   | 269.0458                     | -1.49 | [M-H] <sup>-</sup> | 269, 201, 151, 117                                    | C <sub>15</sub> H <sub>10</sub> O <sub>5</sub>  | Apigenin                  | Flavonoids                          |
|         | 180.16           | 179.0361                   | 179.0358                     | -1.68 | [M-H] <sup>-</sup> | 179, 135, 107                                         | C <sub>9</sub> H <sub>8</sub> O <sub>4</sub>    | Caffeic acid              | Hydroxycinnamic acids               |
|         | 194.18           | 193.0506                   | 193.0504                     | -1.04 | [M-H] <sup>-</sup> | 193, 178, 164, 133, 108                               | C <sub>10</sub> H <sub>10</sub> O <sub>4</sub>  | Ferulic acid              | Cinnamic acids                      |
|         | 134.09           | 133.0141                   | 133.0137                     | -3.01 | [M-H] <sup>-</sup> | 133, 115, 71                                          | C <sub>4</sub> H <sub>6</sub> O <sub>5</sub>    | Malic acid                | Carboxylic acid                     |
|         | 272.25           | 271.0628                   | 271.0636                     | 2.95  | [M-H] <sup>-</sup> | 271, 177, 151, 119,                                   | C <sub>15</sub> H <sub>12</sub> O <sub>5</sub>  | Naringenin                | Flavanone                           |
|         | 302.23           | 301.0351                   | 301.0346                     | -1.66 | [M-H] <sup>-</sup> | 301.08, 271, 179, 151,119                             | C <sub>15</sub> H <sub>10</sub> O <sub>7</sub>  | Quercetin                 | Flavonoid                           |
|         | 610.5            | 609.1456                   | 609.1454                     | -0.33 | [M-H] <sup>-</sup> | 609.25, 301.08, 299, 271, 255, 178                    | C <sub>27</sub> H <sub>30</sub> O <sub>16</sub> | Rutin                     | Flavonoid glycosides                |
|         | 178.18           | 383.4023                   | 383.4008                     | -3.91 | [M-H] <sup>-</sup> | 177, 135,119                                          | C <sub>10</sub> H <sub>10</sub> O <sub>3</sub>  | 4-Methoxycinnamic acid    | Cinnamic acids                      |
|         | 192.17           | 191.0346                   | 191.0353                     | 3.66  | [M-H] <sup>-</sup> | 192, 148, 120, 104                                    | C <sub>10</sub> H <sub>8</sub> O <sub>4</sub>   | Scopoletin                | Hydroxycoumarins                    |
|         | 290.27           | 289.0714                   | 289.0716                     | 0.69  | [M-H] <sup>-</sup> | 290, 271, 205, 179 161                                | C <sub>15</sub> H <sub>14</sub> O <sub>6</sub>  | Epicatechin               | Catechin/ Flavonoids                |
|         | 432.38           | 431.0980                   | 431.0986                     | 1.39  | [M-H] <sup>-</sup> | 431, 285, 255, 227                                    | C <sub>21</sub> H <sub>20</sub> O <sub>10</sub> | kaempferol-3-O-rhamnoside | Flavonoid glycosides                |

|         |        |          |          |       |                    |                           |                                                 |                                      |                             |
|---------|--------|----------|----------|-------|--------------------|---------------------------|-------------------------------------------------|--------------------------------------|-----------------------------|
| Aqueous | 463.4  | 463.0867 | 463.0887 | 4.32  | [M-H] <sup>-</sup> | 463, 301, 271             | C <sub>21</sub> H <sub>19</sub> O <sub>12</sub> | Quercetin-3-O-glucoside              | Flavonoid                   |
|         | 610.6  | 609.1811 | 609.1806 | -0.82 | [M-H] <sup>-</sup> | 609, 301                  | C <sub>28</sub> H <sub>34</sub> O <sub>15</sub> | Hesperidin                           | Flavonoid glycosides        |
|         | 286.23 | 285.0374 | 285.0392 | 6.31  | [M-H] <sup>-</sup> | 285, 164,119              | C <sub>15</sub> H <sub>10</sub> O <sub>6</sub>  | Kaempferol                           | Flavanols                   |
|         | 448.38 | 447.0959 | 447.0944 | -3.35 | [M-H] <sup>-</sup> | 447.09, 285, 255,227, 151 | C <sub>21</sub> H <sub>20</sub> O <sub>11</sub> | kaempferol-3-O-glucoside             | Flavonoid glycosides        |
|         | 286.24 | 285.0399 | 285.0402 | 1.05  | [M-H] <sup>-</sup> | 285, 175, 152, 133, 107   | C <sub>15</sub> H <sub>10</sub> O <sub>6</sub>  | Luteolin                             | Flavones                    |
|         | 448.37 | 447.0934 | 447.0927 | -1.57 | [M-H] <sup>-</sup> | 447, 285                  | C <sub>21</sub> H <sub>20</sub> O <sub>11</sub> | Luteolin 7-O-glucoside               | Flavonoid glycosides        |
|         | 624.54 | 623.1626 | 623.1609 | -2.73 | [M-H] <sup>-</sup> | 623,315, 299,285,271      | C <sub>28</sub> H <sub>32</sub> O <sub>16</sub> | Narcissin/Isorhmnetin 3-O-rutinoside | Flavonoid glycosides        |
|         | 164.16 | 163.0399 | 163.0404 | 3.07  | [M-H] <sup>-</sup> | 163.0, 119, 93            | C <sub>9</sub> H <sub>8</sub> O <sub>3</sub>    | <i>p</i> -coumaric acid              | Hydroxycinnamic acids       |
|         | 196.16 | 195.0506 | 195.0501 | -2.56 | [M-H] <sup>-</sup> | 195, 177, 129, 75         | C <sub>6</sub> H <sub>12</sub> O <sub>7</sub>   | Gluconic Acid                        | Sugar acids and derivatives |

**Table S2. Precision validation of analytical method *C. melo* seed extracts**

| Analytes                  | Theoretical concentration ( $\mu\text{g ml}^{-1}$ ) | Inter-day precision ( $n = 5$ )                  |       | Intra-day precision ( $n=5$ )                    |       |
|---------------------------|-----------------------------------------------------|--------------------------------------------------|-------|--------------------------------------------------|-------|
|                           |                                                     | Measured concentration ( $\mu\text{g ml}^{-1}$ ) | RSD % | Measured concentration ( $\mu\text{g ml}^{-1}$ ) | RSD % |
| Stigmasterol              | 100                                                 | 99.24 $\pm$ 1.86                                 | 1.88  | 98.61 $\pm$ 1.01                                 | 1.03  |
| $\beta$ -sitosterol       | 100                                                 | 98.10 $\pm$ 0.62                                 | 0.63  | 98.72 $\pm$ 0.70                                 | 0.71  |
| Umbelliferone             | 100                                                 | 97.93 $\pm$ 0.92                                 | 0.94  | 98.19 $\pm$ 1.12                                 | 1.14  |
| Caffeic acid              | 100                                                 | 98.37 $\pm$ 1.05                                 | 1.07  | 98.81 $\pm$ 0.30                                 | 0.30  |
| Rutin                     | 100                                                 | 98.06 $\pm$ 1.23                                 | 1.25  | 97.98 $\pm$ 1.46                                 | 1.49  |
| Quercetin                 | 100                                                 | 98.77 $\pm$ 1.67                                 | 1.69  | 98.65 $\pm$ 1.27                                 | 1.28  |
| Apigenin                  | 100                                                 | 98.80 $\pm$ 1.27                                 | 1.29  | 98.88 $\pm$ 1.60                                 | 1.62  |
| Ferulic acid              | 100                                                 | 98.76 $\pm$ 1.61                                 | 1.63  | 98.61 $\pm$ 1.31                                 | 1.33  |
| 1,4-Dicaffeoylquinic acid | 100                                                 | 98.40 $\pm$ 0.88                                 | 0.90  | 98.75 $\pm$ 1.73                                 | 1.75  |
| Kaempferol                | 100                                                 | 98.72 $\pm$ 0.91                                 | 0.92  | 98.28 $\pm$ 1.80                                 | 1.83  |
| Luteolin                  | 100                                                 | 97.94 $\pm$ 1.88                                 | 1.92  | 98.52 $\pm$ 1.54                                 | 1.56  |
| Hesperidin                | 100                                                 | 98.66 $\pm$ 0.92                                 | 0.93  | 98.59 $\pm$ 1.15                                 | 1.17  |
| Narcissin                 | 100                                                 | 97.91 $\pm$ 1.09                                 | 1.12  | 98.32 $\pm$ 2.21                                 | 2.25  |

All values are mean  $\pm$  S.D. taken as triplicates. Percent coefficient of variation (% RSD); (SD/Mean)  $\times 100$ .

**Table S3. Accuracy validation of analytical method of *C. melo* seed extracts through % recovery method**

| Analytes                  | Standard additions µg/ml | % Recovery |        |        | Mean± SD    | RSD% |
|---------------------------|--------------------------|------------|--------|--------|-------------|------|
|                           |                          | Day 1      | Day 2  | Day 3  |             |      |
| Stigmasterol              | 50                       | 49.42      | 49.60  | 49.42  | 49.11±0.54  | 1.09 |
|                           | 100                      | 98.05      | 96.89  | 99.04  | 98.26±0.84  | 0.86 |
|                           | 200                      | 197.79     | 197.94 | 200.25 | 198.95±1.27 | 0.64 |
| β-sitosterol              | 50                       | 48.32      | 49.09  | 48.92  | 49.41±0.93  | 1.88 |
|                           | 100                      | 96.82      | 98.43  | 101.03 | 99.34±1.70  | 1.71 |
|                           | 200                      | 195.42     | 195.96 | 197.85 | 197.60±2.00 | 1.01 |
| Umbelliferone             | 50                       | 48.32      | 49.49  | 48.92  | 49.09±0.71  | 1.45 |
|                           | 100                      | 96.82      | 98.97  | 98.03  | 98.65±1.28  | 1.30 |
|                           | 200                      | 194.82     | 195.96 | 197.24 | 198.57±3.68 | 1.85 |
| Caffeic acid              | 50                       | 48.32      | 48.59  | 48.92  | 48.79±0.37  | 0.75 |
|                           | 100                      | 97.81      | 98.97  | 99.03  | 99.02±0.75  | 0.76 |
|                           | 200                      | 194.82     | 194.97 | 197.24 | 198.37±3.88 | 1.95 |
| Rutin                     | 50                       | 50.30      | 48.86  | 50.92  | 50.16±0.79  | 1.57 |
|                           | 100                      | 98.80      | 98.43  | 100.03 | 99.31±0.67  | 0.67 |
|                           | 200                      | 197.79     | 197.08 | 200.25 | 198.78±1.48 | 0.75 |
| Quercetin                 | 50                       | 48.32      | 49.19  | 48.92  | 49.43±0.92  | 1.87 |
|                           | 100                      | 98.82      | 98.43  | 100.05 | 99.60±0.98  | 0.99 |
|                           | 200                      | 195.81     | 195.96 | 198.25 | 197.76±1.91 | 0.97 |
| Apigenin                  | 50                       | 48.32      | 49.49  | 48.92  | 49.08±0.51  | 1.04 |
|                           | 100                      | 97.81      | 98.97  | 99.03  | 98.85±0.93  | 0.94 |
|                           | 200                      | 194.82     | 197.94 | 197.24 | 197.76±2.02 | 1.02 |
| Ferulic acid              | 50                       | 49.30      | 49.49  | 49.91  | 49.88±0.52  | 1.04 |
|                           | 100                      | 98.80      | 97.63  | 100.03 | 99.38±1.14  | 1.14 |
|                           | 200                      | 195.82     | 197.94 | 199.25 | 198.36±1.70 | 0.86 |
| 1,4-Dicaffeoylquinic acid | 50                       | 47.75      | 48.50  | 49.34  | 48.86±0.75  | 1.54 |
|                           | 100                      | 98.31      | 98.97  | 99.54  | 99.25±0.70  | 0.71 |
|                           | 200                      | 197.19     | 197.95 | 200.64 | 198.92±1.36 | 0.68 |
| Kaempferol                | 50                       | 48.51      | 48.50  | 49.11  | 48.99±1.00  | 2.03 |
|                           | 100                      | 97.22      | 97.98  | 98.43  | 98.72±1.25  | 1.27 |
|                           | 200                      | 196.33     | 196.95 | 198.77 | 198.63±2.21 | 1.11 |
| Luteolin                  | 50                       | 48.51      | 49.48  | 49.11  | 49.03±0.39  | 0.80 |
|                           | 100                      | 98.00      | 98.97  | 99.22  | 99.16±0.77  | 0.78 |
|                           | 200                      | 195.67     | 197.94 | 198.10 | 198.77±2.37 | 1.19 |
| Hesperidin                | 50                       | 48.90      | 49.05  | 49.51  | 49.72±0.88  | 1.78 |
|                           | 100                      | 98.33      | 97.98  | 99.55  | 99.15±0.94  | 0.95 |
|                           | 200                      | 196.99     | 200.91 | 199.44 | 199.27±1.43 | 0.72 |
| Narcissin                 | 50                       | 48.51      | 49.49  | 49.11  | 49.76±1.06  | 2.13 |
|                           | 100                      | 99.66      | 97.98  | 97.87  | 98.97±0.98  | 0.99 |
|                           | 200                      | 196.99     | 194.98 | 199.24 | 198.34±2.32 | 1.17 |



All values are mean  $\pm$  S.D. taken as triplicates. Percent relative of SD variation (% RSD);  $(SD/Mean) \times 100$ .

**Table S4. Network analysis of pathogenic target genes interaction with phytoconstituents**

| Name                         | Type    | Betweenness<br>Centrality | Closeness<br>Centrality | Degree |
|------------------------------|---------|---------------------------|-------------------------|--------|
| PIK3R1                       | Gene    | 0.053844436               | 0.324324324             | 5      |
| Quercetin                    | Ethanol | 0.148531949               | 0.380952381             | 6      |
| Apigenin                     | Ethanol | 0.226053803               | 0.380952381             | 6      |
| Kaempferol                   | Aqueous | 0.078000548               | 0.358208955             | 5      |
| Luteolin                     | Aqueous | 0.078000548               | 0.358208955             | 5      |
| naringenin                   | Ethanol | 0.010174021               | 0.275862069             | 3      |
| NOS2                         | Gene    | 0.435628019               | 0.333333333             | 5      |
| Narcissin                    | Aqueous | 0.00102657                | 0.258064516             | 2      |
| Stigmasterol                 | DCM     | 0.079830918               | 0.311688312             | 2      |
| Ferulic acid                 | Ethanol | 0.334057971               | 0.369230769             | 2      |
| Linoleic acid                | Hexane  | 0.22826087                | 0.269662921             | 2      |
| Palmitic acid                | Hexane  | 0.008091787               | 0.311688312             | 2      |
| PTGDR2                       | Gene    | 0.163043478               | 0.222222222             | 3      |
| Sitosterol                   | DCM     | 0                         | 0.252631579             | 1      |
| Oleic acid                   | Hexane  | 0                         | 0.252631579             | 1      |
| ALOX15                       | Gene    | 0.398168108               | 0.413793103             | 6      |
| Caffeic acid                 | Ethanol | 0                         | 0.183206107             | 1      |
| IGF1R                        | Gene    | 0.0854269                 | 0.333333333             | 6      |
| 1,4-Dicaffeoylquinic<br>acid | Ethanol | 0                         | 0.183206107             | 1      |
| ABCC1                        | Gene    | 0.072443808               | 0.333333333             | 6      |
| IL2RB                        | Gene    | 0.10034219                | 0.307692308             | 5      |
| Rutin                        | Ethanol | 0                         | 0.237623762             | 1      |
| CACNA1A                      | Gene    | 0.086755233               | 0.307692308             | 3      |
| Rutin                        | Ethanol | 0                         | 0.237623762             | 1      |
| TBXAS1                       | Gene    | 0.100724638               | 0.342857143             | 2      |

**Table S5.** The binding energies (kcal/mol) of docked ligand-protein complex calculated with Prime MM-GBSA

| Compounds                                      | Docking score<br>(kcal/mol) | Glide energy<br>(kcal/mol) | $\Delta G$ Bind<br>(kcal/mol) | pKi<br>( $\mu$ M) | $\Delta G$ Coulomb<br>(kcal/mol) | $\Delta G$ Covalent<br>(kcal/mol) | $\Delta G$ Hbond<br>(kcal/mol) | $\Delta G$ Lipo<br>(kcal/mol) | $\Delta G$ Packing<br>(kcal/mol) | $\Delta G$ Solv GB<br>(kcal/mol) | $\Delta G$ vdW<br>(kcal/mol) | Residue–Ligand Interactions with Distance (Å)                                                                                                                     |                                                                                                                                              |
|------------------------------------------------|-----------------------------|----------------------------|-------------------------------|-------------------|----------------------------------|-----------------------------------|--------------------------------|-------------------------------|----------------------------------|----------------------------------|------------------------------|-------------------------------------------------------------------------------------------------------------------------------------------------------------------|----------------------------------------------------------------------------------------------------------------------------------------------|
|                                                |                             |                            |                               |                   |                                  |                                   |                                |                               |                                  |                                  |                              | Hydrogen Bonds                                                                                                                                                    | Electrostatic /<br>Hydrophobic Bonds                                                                                                         |
| Interleukin 2 Receptor Subunit $\beta$ (IL2RB) |                             |                            |                               |                   |                                  |                                   |                                |                               |                                  |                                  |                              |                                                                                                                                                                   |                                                                                                                                              |
| Rutin                                          | −6.82                       | −41.93                     | −36.20                        | −12.49            | −26.81                           | 7.07                              | −2.39                          | −8.03                         | −1.17                            | 20.33                            | −25.23                       | Conventional hydrogen bond: Asn87 (1.78 Å), Asn43 (1.85 Å), Asn43 (1.90 Å), Arg131 (1.60 Å), Carbon hydrogen bond: Ser45 (2.49 Å), Asn87 (2.56 Å), Asn43 (3.03 Å) | Pi–Cation; Pi–Donor Hydrogen Bond: Arg131 (4.03 Å), Pi–Sulfur: Met133 (4.25 Å), Pi–Alkyl: Pro222 (4.91 Å), Pro222 (4.88 Å), Arg131 (5.47 Å), |
| Luteolin                                       | −6.22                       | −35.82                     | −38.97                        | −13.70            | −26.40                           | 6.22                              | −2.36                          | −6.75                         | −1.93                            | 16.28                            | −24.03                       | Conventional hydrogen bond: Arg131 (1.62 Å), Phe37 (2.33 Å), Carbon hydrogen bond: Met133 (2.88 Å), Ala134 (1.84 Å), Arg131 (2.32 Å),                             | Pi–Sigma: Pro222 (2.61 Å), Pi–Cation: Arg131 (4.30 Å), Pi–Sulfur: Met133 (4.22 Å), Pi–Alkyl: Met133 (5.06 Å), Pro222 (4.45 Å),               |
| Quercetin                                      | −3.85                       | −42.28                     | −28.68                        | −9.23             | −64.90                           | 6.58                              | −2.25                          | −7.41                         | −3.05                            | 71.39                            | −29.05                       | Conventional hydrogen bond: Ser45 (2.91 Å), Asn87 (1.91 Å), Arg131 (2.18 Å), Arg131 (2.54 Å), Phe37 (3.05 Å), Arg131 (3.10 Å), Asn43 (2.41 Å),                    | Pi–Sigma: Pro222 (2.72 Å), Pi–Sulfur: Met133 (5.76 Å), Alkyl: Val47 (4.63 Å), Pi–Alkyl: Ala134 (4.67 Å), Pro222 (4.34 Å), Met133 (5.12 Å),   |

|               |       |        |        |        |        |      |       |        |       |       |        |                                                                                                                                                     |                                                                                                                                       |
|---------------|-------|--------|--------|--------|--------|------|-------|--------|-------|-------|--------|-----------------------------------------------------------------------------------------------------------------------------------------------------|---------------------------------------------------------------------------------------------------------------------------------------|
| Umbelliferone | -3.52 | -26.52 | -35.59 | -12.23 | -17.79 | 1.15 | -1.10 | -6.93  | -2.01 | 11.39 | -20.30 | Carbon hydrogen bond: Ser45 (2.67 Å),<br>Conventional hydrogen bond: Ala134 (2.17 Å), Arg131 (1.64 Å), Carbon hydrogen bond: Pro222 (3.07 Å),       | Pi-Cation: Arg131 (4.57 Å), Pi-Sulfur: Met133 (3.73 Å), Met133 (3.77 Å), Pi-Alkyl: Pro222 (4.87 Å),                                   |
| Kaempferol    | -3.40 | -31.55 | -30.08 | -9.83  | -22.87 | 7.41 | -1.81 | -5.41  | -1.08 | 18.17 | -24.49 | Conventional hydrogen bond: Arg131 (2.05 Å), Arg131 (1.71 Å), Trp223 (2.37 Å), Carbon hydrogen bond: Ser45 (2.60 Å),                                | Pi-Cation: Arg131 (4.46 Å), Pi-Sulfur: Met133 (4.24 Å), Met133 (3.98 Å), Pi-Alkyl: Pro222 (5.35 Å), Ala134 (3.71 Å), Pro222 (4.56 Å), |
| Ferulic acid  | -3.27 | -22.50 | -20.23 | -5.56  | -8.78  | 1.25 | -1.12 | -8.48  | -0.97 | 18.90 | -21.03 | Conventional hydrogen bond: Arg131 (2.25 Å), Arg131 (1.91 Å), Carbon hydrogen bond: Phe37 (2.48 Å), Asn43 (2.74 Å), Asn43 (2.58 Å), Phe37 (2.73 Å), | Pi-Cation: Arg131pi-Sulfur: Met133 (3.88 Å),                                                                                          |
| Apigenin      | -2.97 | -30.28 | -28.44 | -9.12  | -23.70 | 9.14 | -1.81 | -4.56  | -1.09 | 18.86 | -25.27 | Conventional hydrogen bond: Arg131 (2.06 Å), Arg131 (1.72 Å), Trp223 (2.39 Å), Carbon hydrogen bond: Ser45 (2.62 Å),                                | Pi-Cation: Arg131 (4.46 Å), Pi-Sulfur: Met133 (4.24 Å), Met133 (3.99 Å), Pi-Alkyl: Pro222 (5.32 Å), Ala134 (3.71 Å), Pro222 (4.56 Å), |
| Verapamil     | -1.60 | -37.75 | -46.89 | -17.13 | -2.41  | 2.52 | -1.10 | -17.30 | -1.00 | 9.31  | -36.91 | Conventional hydrogen bond: Ser45                                                                                                                   | Pi-Cation; Pi-Donor Hydrogen Bond: Arg131                                                                                             |

|                                |        |        |        |        |        |       |       |        |       |       |        |                                                                                                                                                                                                                                                               |                                                                                                                                                                                                                        |
|--------------------------------|--------|--------|--------|--------|--------|-------|-------|--------|-------|-------|--------|---------------------------------------------------------------------------------------------------------------------------------------------------------------------------------------------------------------------------------------------------------------|------------------------------------------------------------------------------------------------------------------------------------------------------------------------------------------------------------------------|
|                                |        |        |        |        |        |       |       |        |       |       |        | (2.76 Å), Arg131 (2.03 Å), Carbon hydrogen bond: Ser45 (2.62 Å), Ser45 (2.69 Å), Asn43 (2.50 Å), Phe37 (2.55 Å), Asn43 (2.68 Å), Phe37 (2.72 Å), Arg131 (2.61 Å),                                                                                             | (4.13 Å), Pi-Sigma: Val79 (2.94 Å), Pi-Sulfur: Met133 (4.45 Å), Alkyl: Val47 (4.59 Å), Val79 (4.57 Å), Val79 (4.78 Å), Pi-Alkyl: Ala85 (3.89 Å),                                                                       |
| Nitric Oxide Synthase 2 (NOS2) |        |        |        |        |        |       |       |        |       |       |        |                                                                                                                                                                                                                                                               |                                                                                                                                                                                                                        |
| Rutin                          | -14.69 | -75.74 | -18.93 | -4.99  | -27.16 | 23.80 | -4.77 | -18.44 | -9.78 | 74.07 | -56.65 | Conventional hydrogen bond: Ile201 (1.92 Å), Glu377 (2.07 Å), Pro350 (2.61 Å), Cys200 (3.03 Å), Arg199 (1.63 Å), Asn370 (1.84 Å), Arg199 (2.99 Å), Carbon hydrogen bond: Gly371 (2.95 Å), Glu377 (2.55 Å), Arg199 (2.51 Å), Arg199 (2.98 Å), Trp463 (2.56 Å), | Pi-Anion: Cys200 (3.87 Å), Pi-Pi Stacked: Trp194 (4.22 Å), Trp194 (3.65 Å), Trp194 (5.32 Å), Trp194 (4.13 Å), Phe369 (4.34 Å), Phe369 (4.14 Å), Pi-Alkyl: Cys200 (4.21 Å), Ala197 (4.32 Å), Cys200 (4.66 Å),           |
| Quercetin                      | -10.50 | -58.68 | -42.09 | -15.05 | -37.64 | 8.23  | -2.24 | -15.54 | -4.90 | 54.53 | -44.52 | Conventional hydrogen bond: Tyr491 (2.45 Å), Glu377 (2.32 Å), Glu377 (2.16 Å), Tyr489 (1.79 Å), Cys200 (2.14 Å), Carbon hydrogen bond: Arg199 (2.65 Å), Glu377 (2.85 Å),                                                                                      | Pi-Sigma: Met355 (2.45 Å), Pi-Sulfur: Met355 (4.27 Å), Met355 (4.41 Å), Pi-Pi Stacked: Trp194 (4.29 Å), Phe369 (3.93 Å), Pi-Pi T-Shaped: Tyr491 (5.55 Å), Pi-Alkyl: Ala197 (4.42 Å), Arg199 (5.23 Å), Cys200 (5.44 Å), |

|            |       |        |        |        |        |      |       |        |       |       |        |                                                                                                                       |                                                                                                                                                                                                                                                                              |
|------------|-------|--------|--------|--------|--------|------|-------|--------|-------|-------|--------|-----------------------------------------------------------------------------------------------------------------------|------------------------------------------------------------------------------------------------------------------------------------------------------------------------------------------------------------------------------------------------------------------------------|
|            |       |        |        |        |        |      |       |        |       |       |        |                                                                                                                       | Ala197 (4.78 Å), Arg199 (4.40 Å), Ala197 (4.79 Å), Cys200 (4.47 Å),                                                                                                                                                                                                          |
| Luteolin   | −9.09 | −40.07 | −47.68 | −17.48 | −41.19 | 6.01 | −1.01 | −12.68 | −4.92 | 38.94 | −32.84 | Conventional hydrogen bond: Tyr491 (2.44 Å), Tyr489 (1.81 Å), Cys200 (2.01 Å), Carbon hydrogen bond: Arg199 (2.63 Å), | Pi–Sulfur: Met355 (4.27 Å), Met355 (4.41 Å), Pi–Pi Stacked: Trp194 (4.31 Å), Phe369 (3.98 Å), Pi–Pi T–Shaped: Tyr491 (5.47 Å), Pi–Alkyl: Ala197 (4.38 Å), Arg199 (5.19 Å), Ala197 (4.86 Å), Arg199 (4.39 Å), Ala197 (4.73 Å), Cys200 (4.41 Å),                               |
| Kaempferol | −8.14 | −39.60 | −25.84 | −7.99  | −16.63 | 2.14 | −0.75 | −10.09 | −9.93 | 46.22 | −36.79 | Conventional hydrogen bond: Ser242 (1.95 Å), Asn370 (2.30 Å), Carbon hydrogen bond: Gly371 (2.78 Å),                  | Pi–Donor Hydrogen Bond: Tyr489 (3.07 Å), Trp372 (2.38 Å), Pi–Pi Stacked: Trp194 (3.53 Å), Trp194 (3.92 Å), Trp194 (3.94 Å), Trp194 (5.27 Å), Phe369 (3.94 Å), Pi–Pi T–Shaped: Trp372 (5.07 Å), Trp372 (5.53 Å), Pi–Alkyl: Cys200 (4.91 Å), Ala197 (5.20 Å), Cys200 (4.60 Å), |
| Apigenin   | −7.98 | −36.73 | −38.28 | −13.40 | −27.47 | 4.65 | −0.85 | −13.17 | −4.97 | 37.56 | −34.03 | Conventional hydrogen bond: Tyr491 (2.61 Å), Tyr489 (1.79 Å), Carbon hydrogen bond: Arg199 (2.67 Å),                  | Pi–Donor Hydrogen Bond: Trp194 (2.89 Å), Pi–Sigma: Met355 (2.46 Å), Pi–Sulfur: Met355 (4.32 Å), Met355 (4.38 Å), Pi–Pi Stacked:                                                                                                                                              |



|               |       |        |        |        |        |      |       |        |        |       |        |                                                                                                                                                                           |                                                                                                                                                                                                                                                                                                                      |
|---------------|-------|--------|--------|--------|--------|------|-------|--------|--------|-------|--------|---------------------------------------------------------------------------------------------------------------------------------------------------------------------------|----------------------------------------------------------------------------------------------------------------------------------------------------------------------------------------------------------------------------------------------------------------------------------------------------------------------|
|               |       |        |        |        |        |      |       |        |        |       |        |                                                                                                                                                                           | Trp194 (4.21 Å), Trp194 (5.69 Å), Phe369 (3.89 Å), Pi-Pi T-Shaped: Tyr491 (5.62 Å), Pi-Alkyl: Ala197 (4.31 Å), Arg199 (5.32 Å), Cys200 (5.34 Å), Ala197 (4.73 Å), Arg199 (4.41 Å), Ala197 (4.83 Å), Cys200 (4.57 Å),                                                                                                 |
| Umbelliferone | -6.83 | -25.99 | -28.30 | -9.06  | -0.91  | 3.78 | -0.96 | -17.83 | -10.04 | 21.05 | -23.40 | Conventional hydrogen bond: Asn370 (1.73 Å),                                                                                                                              | Pi-Pi Stacked: Trp194 (4.04 Å), Trp194 (3.58 Å), Trp194 (5.43 Å), Trp194 (3.92 Å), Phe369 (3.80 Å), Phe369 (4.46 Å), Pi-Alkyl: Ala197 (5.08 Å), Cys200 (4.77 Å),                                                                                                                                                     |
| Verapamil     | -6.08 | -55.87 | -60.12 | -22.88 | -27.31 | 4.87 | -1.57 | -34.44 | -4.91  | 61.88 | -58.63 | Salt Bridge;Attractive Charge: Glu377 (2.50 Å), Hydrogen Bond: Trp372 (2.79 Å), Carbon hydrogen bond: Arg199 (3.07 Å), Glu377 (2.62 Å), Tyr373 (3.02 Å), Trp372 (2.80 Å), | Pi-Sigma: Gly202 (2.59 Å), Pi-Sulfur: Cys200 (3.99 Å), Pi-Pi T-Shaped: Phe369 (4.51 Å), Trp372 (5.53 Å), Alkyl: Met374 (4.92 Å), Met434 (3.95 Å), Pi-Alkyl: Trp194 (4.06 Å), Trp194 (3.66 Å), Trp194 (5.26 Å), Trp194 (3.58 Å), Trp194 (5.02 Å), Phe369 (3.51 Å), Trp372 (4.19 Å), Trp372 (4.16 Å), Trp372 (3.62 Å), |

|                                                                     |       |        |        |        |        |       |       |        |       |       |        |                                                                                                                                                                                              |                                                                                                                                                                                          |
|---------------------------------------------------------------------|-------|--------|--------|--------|--------|-------|-------|--------|-------|-------|--------|----------------------------------------------------------------------------------------------------------------------------------------------------------------------------------------------|------------------------------------------------------------------------------------------------------------------------------------------------------------------------------------------|
|                                                                     |       |        |        |        |        |       |       |        |       |       |        |                                                                                                                                                                                              | Tyr489 (4.38 Å), Cys200 (5.19 Å),                                                                                                                                                        |
| Ferulic acid                                                        | -5.95 | -26.82 | -8.19  | -0.33  | 28.26  | 1.88  | -0.19 | -20.51 | -5.24 | 20.77 | -33.16 | Conventional hydrogen bond: Ser242 (2.73 Å),                                                                                                                                                 | Pi-Pi Stacked: Trp194 (3.49 Å), Trp194 (4.08 Å), Phe369 (4.55 Å), Alkyl: Leu209 (4.53 Å), Ile244 (4.44 Å), Pi-Alkyl: Trp194 (4.94 Å), Phe369 (4.29 Å), Tyr489 (4.49 Å), Cys200 (5.15 Å), |
| Voltage-dependent L-type calcium channel subunit alpha-1C (VGCAC1C) |       |        |        |        |        |       |       |        |       |       |        |                                                                                                                                                                                              |                                                                                                                                                                                          |
| Rutin                                                               | -9.07 | -57.33 | -20.14 | -5.52  | -58.00 | 10.83 | -2.79 | -14.40 | -0.41 | 89.69 | -45.06 | Conventional hydrogen bond: Asn741 (1.69 Å), Ser1132 (1.73 Å), Glu1135 (2.21 Å), Gly1463 (3.00 Å), Glu363 (1.96 Å), Carbon hydrogen bond: Gly705 (2.98 Å), Asn741 (2.99 Å), Asn741 (2.79 Å), | Alkyl: Leu744 (4.82 Å), Leu745 (4.44 Å), Met1178 (5.29 Å), Pi-Alkyl: Phe748 (5.44 Å),                                                                                                    |
| Quercetin                                                           | -7.58 | -48.23 | -40.37 | -14.30 | -5.50  | 6.64  | -1.05 | -16.75 | -1.00 | 25.22 | -47.92 | Conventional hydrogen bond Ile738 (2.57 Å), Asn741 (1.92 Å), Thr361 (1.90 Å), Carbon hydrogen bond: Ile738 (2.86 Å),                                                                         | Pi-Pi T-Shaped: Phe737 (5.24 Å), Phe737 (5.29 Å), Alkyl: Ile738 (4.12 Å), Pi-Alkyl: Leu397 (4.87 Å), Ile360 (4.71 Å), Val396 (5.33 Å),                                                   |
| Apigenin                                                            | -6.12 | -32.47 | -24.50 | -7.41  | -11.43 | 0.24  | -0.78 | -8.01  | -0.24 | 25.42 | -29.70 | Conventional hydrogen bond: Ile360 (2.04 Å), Asn741 (2.71 Å),                                                                                                                                | Pi-Donor Hydrogen Bond: Tyr742 (3.29 Å), Pi-Alkyl: Val275 (5.46 Å), Val400 (5.07 Å),                                                                                                     |

|               |       |        |        |        |        |      |       |        |       |        |        |                                                                                                                                                                                                                                                                                          |                                                                                                                                                                              |
|---------------|-------|--------|--------|--------|--------|------|-------|--------|-------|--------|--------|------------------------------------------------------------------------------------------------------------------------------------------------------------------------------------------------------------------------------------------------------------------------------------------|------------------------------------------------------------------------------------------------------------------------------------------------------------------------------|
|               |       |        |        |        |        |      |       |        |       |        |        |                                                                                                                                                                                                                                                                                          | Ala272 (5.42 Å), Val400 (4.33 Å),                                                                                                                                            |
| Luteolin      | -5.78 | -42.83 | -16.03 | -3.73  | -34.43 | 5.30 | -2.57 | -3.71  | -0.94 | 49.26  | -28.94 | Conventional hydrogen bond: Asn741 (2.11 Å), Ile360 (1.84 Å), Glu1135 (1.90 Å), Glu1135 (2.55 Å), Thr1462 (3.04 Å), Gly1463 (1.98 Å),                                                                                                                                                    | Pi-Alkyl: Leu397 (4.90 Å), Met362 (5.05 Å),                                                                                                                                  |
| Verapamil     | -5.77 | -56.89 | -25.64 | -7.91  | -89.04 | 2.95 | -0.81 | -18.14 | -0.67 | 128.72 | -48.66 | Salt Bridge;Attractive Charge: Glu363 (3.12 Å), Glu1135 (2.41 Å), Attractive Charge: Glu706 (5.02 Å), Carbon hydrogen bond: Glu363 (2.60 Å), Glu1135 (2.71 Å), Thr704 (2.49 Å), Glu363 (2.65 Å), Glu1135 (2.73 Å), Asn741 (2.59 Å), Ile360 (2.69 Å), Ser1132 (2.80 Å), Ser1132 (2.86 Å), | Pi-Pi T-Shaped: Phe737 (5.70 Å), Tyr1508 (5.67 Å), Alkyl: Ala1512 (3.85 Å), Met362 (5.13 Å), Pi-Alkyl: Phe737 (4.51 Å), Phe1134 (4.76 Å), Tyr1508 (5.15 Å), Leu397 (4.71 Å), |
| Kaempferol    | -5.75 | -35.56 | -30.99 | -10.23 | -40.42 | 3.84 | -1.59 | -6.27  | -1.29 | 36.70  | -21.96 | Conventional hydrogen bond: Asn741 (1.63 Å), Ile360 (1.80 Å), Thr704 (1.74 Å),                                                                                                                                                                                                           | Pi-Pi T-Shaped: Phe737 (5.49 Å), Phe737 (5.20 Å), Pi-Alkyl: Leu397 (4.55 Å), Leu397 (4.59 Å),                                                                                |
| Umbelliferone | -4.57 | -23.01 | -25.39 | -7.80  | -4.01  | 0.59 | -0.24 | -11.97 | -1.08 | 15.09  | -23.76 | Conventional hydrogen bond: Asn741 (2.86 Å), Carbon hydrogen bond: Thr704 (2.79 Å),                                                                                                                                                                                                      | Pi-Alkyl: Leu744 (4.38 Å), Ala1174 (5.01 Å), Leu744 (4.24 Å), Ala1174 (5.25 Å),                                                                                              |

|              |       |        |        |       |       |      |      |        |      |      |        |                                           |                                                |
|--------------|-------|--------|--------|-------|-------|------|------|--------|------|------|--------|-------------------------------------------|------------------------------------------------|
| Ferulic acid | -3.85 | -17.57 | -10.73 | -1.43 | 15.48 | 2.68 | 0.00 | -11.80 | 0.00 | 5.66 | -22.75 | Carbon hydrogen<br>bond: Ser393 (2.43 Å), | Pi-Alkyl: Phe737 (4.68<br>Å), Leu397 (4.70 Å), |
|--------------|-------|--------|--------|-------|-------|------|------|--------|------|------|--------|-------------------------------------------|------------------------------------------------|

Values are expressed as the mean ± S.D., *n* = 3. ΔG<sub>Binding</sub>: Binding free energy; pK<sub>i</sub>: Logarithmic of Inhibition Constant (K<sub>i</sub>); ΔG<sub>Coulomb</sub>: Coulomb binding energy; ΔG<sub>Covalent</sub>: Covalent binding energy; ΔG<sub>H.</sub>: Hydrogen bonding energy; ΔG<sub>Lipophilic</sub>: Lipophilic binding energy; ΔG<sub>Solv GB</sub>: Generalized born electrostatic solvation energy; ΔG<sub>vdW</sub>: Van der Waals forces energy; These energies all contribute to Binding free energy (ΔG<sub>Binding</sub>).
